# **A systems genetics approach reveals environment-dependent associations**

## **2 between SNPs, protein co-expression and drought-related traits in maize**

### **4 Running title: Systems genetics of drought-related traits in maize**

6 Mélisande Blein-Nicolas<sup>1\*</sup>, Sandra Sylvia Negro<sup>1</sup>, Thierry Balliau<sup>1</sup>, Claude Welcker<sup>2</sup>, Llorenç  
Cabrera Bosquet<sup>2</sup>, Stéphane Dimitri Nicolas<sup>1</sup>, Alain Charcosset<sup>1</sup>, Michel Zivy<sup>1\*</sup>

8

<sup>1</sup> Université Paris-Saclay, INRAE, CNRS, AgroParisTech, GQE – Le Moulon, 91190, Gif-sur-

10 Yvette, France

<sup>2</sup> LEPSE, INRAE, Univ Montpellier, SupAgro, Montpellier, France

12

\* Corresponding authors:

14 michel.zivy@inra.fr, +33-1-69-33-23-65

melisande.blein-nicolas@inra.fr, +33-1-69-15-68-06

16

Keywords: proteomics, GWAS, drought, Zea mays, mass spectrometry, integrative biology

## 18 **ABSTRACT**

20 The effect of drought on maize yield is of particular concern in the context of climate change and  
human population growth. However, the complexity of drought-response mechanisms make the  
22 design of new drought-tolerant varieties a difficult task that would greatly benefit from a better  
understanding of the genotype-phenotype relationship. To provide novel insight into this  
24 relationship, we applied a systems genetics approach integrating high-throughput phenotypic,  
proteomic and genomic data acquired from 254 maize hybrids grown under two watering  
26 conditions. Using association genetics and protein co-expression analysis, we detected more than  
22,000 pQTLs across the two conditions and confidently identified fifteen loci with potential  
28 pleiotropic effects on the proteome. We showed that even mild water deficit induced a profound  
remodeling of the proteome, which affected the structure of the protein co-expression network, and  
30 a reprogramming of the genetic control of the abundance of many proteins, notably those involved  
in stress response. Co-localizations between pQTLs and QTLs for ecophysiological traits, found  
32 mostly in the water deficit condition, indicated that this reprogramming may also affect the  
phenotypic level. Finally, we identified several candidate genes that are potentially responsible for  
34 both the co-expression of stress response proteins and the variations of ecophysiological traits under  
water deficit. Taken together, our findings provide novel insights into the molecular mechanisms of  
36 drought tolerance and suggest some pathways for further research and breeding.

38

40

## INTRODUCTION

42

Maize is the world's leading crop (Shiferaw et al. 2011) in terms of production. Having a C4  
44 metabolism, it exhibits high water use efficiency (WUE). However, it is also highly susceptible to  
water deficit. For example, maize is more affected by drought than either its close relative sorghum  
46 (above-ground dry biomass reduced by 47-51 % and 37-38 %, respectively; Zegada-Lizarazu et al.  
2012, Schittenhelm and Schroetter 2014) or wheat, which is a C3 plant (yield reduction associated  
48 with a 40% water reduction of 40% and 20.6%, respectively; Daryanto et al. 2016). Improving  
maize yield under drought has been an important aim of breeding programs for decades (Campos et  
50 al. 2004, 2006; Cooper et al. 2014). However, despite the overall genetic improvement of maize,  
increases in drought sensitivity have been reported in several regions (Lobell et al. 2014; Zipper et  
52 al. 2016; Meng et al. 2016). In addition, severe episodes of drought are projected to become more  
frequent in the near future due to climate change (Harrison et al. 2014). Therefore, maize  
54 productivity under water deficit is of particular concern and large efforts are still required to design  
varieties that are able to maintain high yields in drought conditions.

56 One lever to accelerate crop improvement is to better understand the genetic and molecular  
bases of drought tolerance. This highly complex trait is associated with a series of mechanisms  
58 occurring at different spatial and temporal scales to (i) stabilize the plant's water and carbon status,  
(ii) control the side effects of water deficit including oxidative stress, mineral deficiencies and  
60 reduced photosynthesis and (iii) maintain plant yield (Chaves et al. 2003). At the physiological  
level, short-term responses include stomata closure, adjustment of osmotic and hydraulic  
62 conductance, leaf growth inhibition and root growth promotion (Tardieu et al. 2018). At the  
molecular level, complex signaling and regulatory events occur, involving several hormones, of  
64 which abscisic acid (ABA) is a key player, and a broad range of transcription factors (Golldack et  
al. 2014; Osakabe et al. 2014; Tripathi et al. 2014). Molecular responses also include the  
66 accumulation of metabolites involved in osmotic adjustment, membrane and protein protection, as

well as scavenging of reactive oxygen species, and the expression of drought-responsive proteins  
68 such as dehydrins, late embryogenesis abundant (LEA) and heat shock proteins (HSP) (Valliyodan  
and Nguyen 2006; Seki et al. 2007). All these responses will depend on the drought scenario, the  
70 phenological stage, the genetic makeup and the general environmental conditions (Tardieu et al.  
2018). Taken together, the multiplicity and versatility of the mechanisms involved explain the  
72 difficulty in selecting for drought tolerance.

A better understanding of the genotype-phenotype relationship will help guide the  
74 development of new drought-tolerant varieties. Systems genetics is a recent approach providing  
improved insight into this relationship by deciphering the biological networks and molecular  
76 pathways underlying complex traits and by investigating how these traits are regulated at the  
genetic and epigenetic levels (Nadeau and Dudley 2011; Civelek and Lusk 2014; Feltus 2014; van  
78 der Sijde et al. 2014; Markowitz and Boutros 2015). This approach compares the position of  
quantitative trait loci (QTLs) underlying phenotypic traits variation to that of QTLs underlying the  
80 variation of upstream molecular traits such as transcript expression (eQTLs) or protein abundance  
(pQTLs). Until recently, this approach had been mostly applied in human and mice (Moreno-Moral  
82 and Petretto 2016) In plants, systems genetics studies have been carried out in a few species  
including wheat (Munkvold et al. 2013), rapeseed (Basnet et al. 2016), eucalyptus (Mizrachi et al.  
84 2017) and maize (Christie et al. 2017; Jiang et al. 2019).

The first studies comparing QTLs and pQTLs used 2D gel proteomics to quantify proteins  
86 (Bourgeois et al. 2011; de Vienne et al. 1999). Since then, proteome coverage and data reliability  
have been widely improved by the use of mass spectrometry (MS)-based proteomics (Wasinger et  
88 al. 2013). Despite these technical advancements, the systems genetics studies published so far have  
preferentially used transcripts rather than proteins as the intermediate level between the genome and  
90 phenotypic traits. One reason is that large-scale proteomics experiments remain challenging (Blein-  
Nicolas et al. 2015) due to technical constraints (Balliau et al. 2018) and the trade-off between  
92 depth of coverage and sample throughput (Keshishian et al. 2017). However, proteins are

particularly relevant molecular components for linking genotype to phenotype. Indeed, proteins  
94 abundance is expected to be more highly related to phenotype than transcript expression due to the  
buffering of transcriptional variations and the role of post-translational regulations in phenotype  
96 construction (Foss et al. 2011; Battle et al. 2015; Chick et al. 2016; Albertin et al. 2013; Vogel and  
Marcotte 2012).

98 Here, we aimed to better understand the molecular mechanisms associated with the genetic  
polymorphisms underlying the variations of ecophysiological traits related to drought tolerance. To  
100 this end, we performed a novel systems genetics study where MS-based proteomics data acquired  
from 254 maize genotypes grown in two watering conditions were integrated with high-throughput  
102 genomic and phenotypic data. First, protein abundance was analyzed using a genome wide  
association study (GWAS) and co-expression networks. Then, these data were integrated with  
104 ecophysiological phenotypic data from the same experiment (Prado et al. 2018) using a correlation  
analysis and by searching for QTL/pQTL co-localizations.

## 106 RESULTS

### 108 Mild water deficit has extensively remodeled the proteome

Using MS-based proteomics, we analyzed more than 1,000 leaf samples taken from 254  
110 genotypes representing the genetic diversity within dent maize and grown in well-watered (WW)  
and water deficit (WD) conditions. After data filtering, the peptide intensity dataset included 977  
112 samples corresponding to 251 genotypes from which we quantified 2,055 proteins described in  
Supplemental Table S1. Among these, 973 were quantified by integration of peptide intensities  
114 (XIC-based quantification). The remaining 1,082, whose peptides had more than 10% of missing  
intensity values, were quantified by spectral counting (SC-based quantification). Note that the latter  
116 proteins were less abundant (Supplemental Fig. S1A) and less precisely quantified (Supplemental  
Fig. S1B) than those that could be quantified by XIC.

118 Heatmap representations of protein abundance showed that two large separate protein clusters  
were associated with the two watering conditions (Fig. 1A). This indicates that, although moderate,  
120 water deficit had extensively remodeled the proteome of most genotypes. Accordingly, 82.4% and  
74.5% of proteins from the XIC-based and SC-based sets, respectively, responded significantly to  
122 water deficit (Supplemental Table S1, Supplemental Figure S2A). These included several proteins  
known to be involved in responses to drought or stress (Shinozaki & Yamaguchi-Shinozaki 2007;  
124 Wang et al. 2016) such as dehydrins (GRMZM2G079440, GRMZM2G373522), an ABA-  
responsive protein (GRMZM2G106622), an LEA protein (GRMZM2G352415), HSPs  
126 (GRMZM2G360681, GRMZM2G080724, GRMZM2G112165), a phospholipase D  
(GRMZM2G061969), a glyoxalase I (GRMZM2G181192) and a glutathione-S-transferase  
128 (GRMZM2G043291). Induced and repressed proteins constituted two highly differentiated  
populations in terms of function (Fig. 1B). In particular, transcription, translation, energy  
130 metabolism and metabolism of cofactors and vitamins were better represented within repressed

132 proteins, while carbohydrate and amino acid metabolism and environmental adaptation were better represented within induced proteins.

The global impact of genotypic change on the proteome was less extensive than that of water deficit, since the proteomes of two different genotypes grown in the same watering condition were more similar than the proteomes of a same genotype grown in different conditions (Fig. 1A). However, the maximum amplitudes of abundance variations were similar (Supplemental Fig. S2B). In addition, 94.9% of proteins from the XIC-based set exhibited significant variation in abundance attributable to genetic variation (Supplemental Table S1). This was confirmed by broad sense heritability, the median of which was 0.47 and 0.46 for WW and WD conditions, respectively (Supplemental Fig. S3A). By contrast, in the SC-based set, only 34.4% of the proteins showed significant variation in abundance attributable to genetic variation with a median broad sense heritability of 0.08 and 0.10 for WW and WD conditions, respectively (Supplemental Fig. S3B).

Significant GxE interactions were detected for only four and 12 proteins from the SC-based and XIC-based set, respectively, probably due to a lack of statistical power. These proteins included an LEA protein (GRMZM2G352415), a HSP (GRMZM2G083810\_P01) and a COR410 dehydrin (GRMZM2G147014\_P01). Although the GxE interaction was not statistically significant for the dehydrin ZmRab17 (GRMZM2G079440), this protein was remarkable because it was undetectable in the WW condition and more or less expressed, depending on genotype, in the WD condition (Fig. 1C, Supplemental Table S2).

150

### **The strength of the genetic control of protein abundance is related to protein function**

152 We performed GWAS for 2,501 combinations of protein abundance x watering condition showing a heritability  $> 0.2$ . In total, we detected 514,270 significant associations for 2,466 (98.6%) combinations of protein abundance x watering condition involving 1,367 proteins. When summarizing associated SNPs into pQTLs using classical methods based on genetic distance or linkage disequilibrium (LD), we observed a positive relationship between the number of pQTLs per

chromosome and the *P-value* of the most strongly associated pQTL from the corresponding  
158 chromosome (Supplemental Fig. S4A,B). To get rid of this artefactual relationship, which could  
lead to the detection of more than 250 pQTLs on one chromosome, we developed a geometric  
160 method based on the *P-value* signal of SNPs (Supplemental Fig. S4C). This method produced the  
lowest number of pQTLs per combination of protein abundance x watering condition (median = 8  
162 vs 13 for the two other methods) and the lowest maximum number of pQTLs per chromosome (18  
vs 272 and 209 for the methods based on genetic distance and LD, respectively). Using this  
164 geometric method and considering only pQTLs accounting for more than 3% of the total variance,  
we thus detected 22,664 pQTLs accounting for 3 to 77.1% of the variance (Supplemental Table S3).  
166 Of these, 1,113 were local, *i.e.* located less than  $10^6$  bp from the protein encoding gene, of which  
339 were located within the genes. Among distant pQTLs, 80.9% were located on a different  
168 chromosome from that of the protein encoding gene. Local pQTLs had stronger effects than distant  
pQTLs (average  $R^2=15.3\%$  and  $5.2\%$ , respectively; Supplemental Fig. S5). For 485 proteins, no  
170 local pQTL was detected in either condition. This set of proteins was significantly enriched in  
proteins involved in translation ( $15.3\%$  vs  $3.8\%$ , adjusted  $P\text{-value} = 2.3E^{-10}$ ) and energy metabolism  
172 ( $17.3\%$  vs  $8.5\%$ , adjusted  $P\text{-value} = 8.2E^{-5}$ ) and depleted in proteins involved in carbohydrate  
metabolism ( $9.9\%$  vs  $19.5\%$ , adjusted  $P\text{-value} = 8.2E^{-5}$ ) compared to the 662 proteins showing a  
174 local pQTL in at least one condition. They also exhibited fewer distant pQTLs and were much less  
heritable (Supplemental Fig. S6). These results indicate that the strength of the genetic control over  
176 protein abundance depends on protein function. This observation is supported by the positive  
correlation between the mean number of pQTLs and the mean heritability per functional category  
178 (Fig. 2).

## 180 **Identification of loci with potential pleiotropic effects on the proteome**

pQTLs were not uniformly distributed in the genome (Fig. 3). Instead, there were genomic  
182 regions enriched with pQTLs. We detected 26 and 31 such hotspots that contained at least 19



pQTLs in the WW and WD conditions, respectively (Supplemental Table S4). These hotspots may  
184 represent loci with pleiotropic effects on the proteome, *i.e.* loci associated with the abundance  
variation of several proteins. To refine the detection of such loci, we used a second independent  
186 approach based on the search for co-expression QTLs (coQTLs), *i.e.*, QTLs associated to the  
abundance variations of several co-expressed proteins. To do so, we first performed a weighted  
188 gene co-expression network analysis (WGCNA) of protein co-expression across the 251 genotypes  
in the two watering conditions separately (Supplemental Table S5). The two resulting networks  
190 differed in the presence of condition-specific modules indicating that water deficit has altered the  
structure of the protein co-expression network (Fig. 4, Supplemental Fig. S7, Supplemental File  
192 S1). For each co-expression module, we then submitted the representative variable, called  
eigengene according to the WGCNA terminology, to GWAS in order to identify coQTLs. In total,  
194 we detected 176 coQTLs (96 for the 8 WW modules and 80 for the 8 WD modules, Supplemental  
Table S3). Fifteen of them co-localized with pQTL hotspots (Supplemental Table S4). Thus by  
196 crossing these results, we confidently identified four loci in the WW condition and eleven loci in the  
WD condition as having potential pleiotropic effects on the proteome. Of note, the proteins that  
198 were associated with hotspots Hs22d and Hs21d and that were also in the modules having coQTLs  
co-localising with these hotspots were mainly ribosomal proteins (Supplemental Table S6). This  
200 suggests that Hs22d and Hs21d may contain loci involved in ribosome biogenesis.

## 202 **The genetic architecture of protein abundances depends on the environment**

Of the 11,034 pQTLs detected in the WW condition, only 1,124 (10.2%) had a co-localizing  
204 pQTL in the WD condition. These pQTLs were generally of strong effect (Supplemental Fig. S8A)  
and were enriched in local pQTLs (32.6% vs 4.9% over the entire dataset). While most of the  
206 pQTLs that were common to the two conditions had similar effects in both conditions, 75 (6.7%) of  
them exhibited contrasted effects (Supplemental Fig. S8B). Half of these pQTLs were local,  
208 suggesting that gene promoters may be involved in the GxE interaction or that the pQTLs that were

210 detected in each condition corresponded to different polymorphic sequences with different effects  
211 on protein abundance. These pQTLs were associated with 70 proteins, several of which were stress-  
212 responsive (*e.g.* the LEA protein GRMZM2G045664, HSPs GRMZM5G813217 and  
213 GRMZM2G536644, Supplemental Table S7). Altogether, these results show that water deficit has  
214 altered the genetic architecture of protein abundance.

214

### Identification of loci associated with trait variation at multiple scales

216 To gain insight into the molecular mechanisms associated with drought tolerance, we searched  
217 for co-localizations between the pQTLs, coQTLs and hotspots detected in our study and the 160  
218 QTLs identified by Prado et al. (2018) on the same plant material. These QTLs were associated  
219 with eight ecophysiological traits related to growth and transpiration rate: early leaf area (*i.e.* before  
220 water deficit; LAe), late leaf area (LAI), early biomass (Be), late biomass (Bl), water use (WU),  
221 water use efficiency (WUE), stomatal conductance (gs) and transpiration rate (Trate). Robust co-  
222 localizations were determined by taking into account the correlation between each trait and protein  
223 values.

224 In total, we identified 68 pairs of SNPs corresponding to QTL/pQTL co-localizations (Fig. 5,  
225 Supplemental Table S8). Only one involved a local pQTL. The QTL/pQTL distance was generally  
226 less than 100 kb, with, in 25.7% of cases, the same SNP representing the QTL and the pQTL (Fig.  
227 6A). Most QTL/pQTL co-localizations (98%) were detected in the WD condition, where they  
228 corresponded to 39 of the 91 QTLs reported in this condition (Prado et al. 2018). They involved six  
229 ecophysiological phenotypic traits (Bl, LAI, WU, WUE, Trate and gs) and 47 proteins, many of  
230 which were stress-responsive (Supplemental Table S9). Twenty-three proteins exhibited multiple  
231 QTL/pQTL co-localizations (Supplemental Table S9).

232 We further identified 11 pairs of SNPs corresponding to QTL/coQTL co-localizations, all in  
233 the WD condition (Supplemental Table S10). They involved three phenotypic traits (WU, Bl, LAI)  
234 and two co-expression modules including the WD-specific module (Fig. 5). These two modules

were significantly enriched in stress-response proteins and in proteins involved in hormone  
236 metabolim and in reactive oxygen species detoxification (Supplemental Table S11). Ten of the 11  
QTLs co-localizing with coQTLs also co-localized with pQTLs. The remaining QTL actually also  
238 co-localized with pQTLs, but with a low correlation between the phenotypic trait values and the  
protein abundance levels ( $|r_{corrected}| < 0.23$ ; Supplemental Table S10). By contrast, the correlation  
240 between trait values and eigengene was much higher ( $|r_{corrected}| = 0.51$ ), which indicates that proteins  
were more strongly related to ecophysiological traits when taken collectively through a co-  
242 expression module rather than taken individually.

Taken together, these results highlight the presence of loci associated with traits at different  
244 biological scales. In the WD condition, several of these loci showed multiple associations both at  
the proteome and the phenotype level (Fig. 5). On Chromosome 1, a locus spanning 33 kbp  
246 contained a QTL for LAI determined by SNP S1\_5382845 as well as a coQTL for the green module  
and seven pQTLs, all determined by SNP AX-91427638. On Chromosome 5, a locus spanning 1.8  
248 Mb between SNPs AX-91657926 and AX-91658235, contained three QTLs for LAI, BI and WU,  
one coQTLs for the WD-specific module and six pQTLs. This region also contained hotspot Hs52d.  
250 On Chromosome 7, a single SNP (S7\_162671160) determined the positions of two QTLs for LAI  
and WU, two coQTLs and seven pQTLs. On Chromosome 10, a locus spanning 1.3 Mb between  
252 SNPs S10\_122802154 and S10\_124095144, contained one QTL for LAI, one coQTL and eight  
pQTLs. This region also contained hotspot Hs103d. Note that in the WD condition, leaf area (LAI)  
254 was repeatedly associated with the green module (on Chromosomes 1, 7, 9, 10) and to proteins  
belonging to this module. Several of them were detoxification enzymes (*i.e.*, a putative polyphenol  
256 oxydase, GRMZM5G851266; two peroxydases, GRMZM2G085967 and GRMZM2G108153; a  
superoxide dismutase GRMZM2G025992; a glyoxalase GRMZM2G704005).

258

### **Identification of candidate genes potentially involved in drought tolerance**

260 Assuming that the genetic polymorphisms associated with protein abundance variations are  
within genes, we retrieved a list of one to 49 candidate genes for each of the 69 pairs of SNPs  
262 corresponding to a QTL/pQTL or QTL/coQTL co-localization (Supplemental Table S12). Based on  
gene annotation and the literature, we identified two particularly interesting cases.

264 First, on Chromosome 7, the SNP S7\_162671160 was located in *ZmGH3.8*  
(GRMZM2G053338), which was the only candidate gene. *ZmGH3.8* is involved in indole-3-acetyl-  
266 amide conjugate biosynthesis. In agreement with the role of this gene in drought response (Feng et  
al. 2015), S7\_162671160 was associated with the WD-specific module, WU and LAI and five  
268 stress-response proteins (endochitinase GRMZM2G051943, beta-D-glucanase GRMZM2G073079,  
peroxidase GRMZM2G085967, polyphenol oxydase GRMZM5G851266 and phospholipase D  
270 GRMZM2G061969).

Second, 14 candidate genes were identified in the region of Chromosome 5 covered by  
272 hotspot Hs52d, of which two could be associated with the expression variation of a high number of  
genes. One is a squamosa promoter-binding (SBP) gene (GRMZM2G111136) that is inducible by  
274 various abiotic stresses including drought (Mao et al. 2016). The other, a C2C2-CO-like  
transcription factor (GRMZM2G148772), was found to be significantly induced by drought and  
276 salinity stress in B73 leaves (Forestan et al. 2016). Hotspot Hs52d covered a region of *ca* 4 Mb in  
which we detected 26 pQTLs (many of which were located between the SBP gene and the C2C2-  
278 CO-like transcription factor), two coQTLs and four QTLs (Fig. 6B). A single SNP, AX-91658235  
located only one kbp from the C2C2-CO-like transcription factor, determined the position of two  
280 QTLs, two pQTLs and one coQTL. Furthermore, SNP S5\_88793314, located within the coding  
sequence of the SBP gene, determined the position of a QTL and a pQTL. Based on these results,  
282 we can hypothesize that hotspot Hs52d may correspond to two trans-acting factors for which the  
SBP gene and the C2C2-CO-like transcription factor represent good candidates.

## 284 **DISCUSSION**

286 To better understand the molecular mechanisms associated with the genetic polymorphisms  
underlying the variations in ecophysiological traits related to drought tolerance, we used a  
288 proteomics-based systems genetics approach which allowed us to map 22,664 pQTLs at high-  
resolution. By relating pQTLs to protein functions and heritability, we showed that the level of  
290 genetic control over protein abundances depends on protein function. Notably, proteins involved in  
translation and energy metabolism exhibited few pQTLs, with a lack of local pQTLs and low  
292 heritability. As these two functional categories mainly contain ancient and evolutionarily conserved  
proteins (Goldman et al. 2010; Nelson and Junge 2015), our results suggest that evolutionarily  
294 ancient proteins have more constrained expressions and fewer associated pQTLs (Mähler et al.  
2017; Popadin et al. 2014; Zhang and Yang 2015). They also support the recent hypothesis of  
296 Mähler et al. (2017) that, for genes experiencing reduced rates of molecular evolution, purifying  
selection on individual SNPs is associated with stabilizing selection on gene expression.

298 pQTLs were found throughout the genome but some of them clustered into hotspots,  
suggesting the presence of loci with pleiotropic effects on the proteome. The detection of QTL  
300 hotspots is highly dependent on the number of traits studied, the mapping resolution and the method  
used to cluster QTLs. This may explain why previous studies have reported hotspots ranging from  
302 hundreds of eQTLs (Munkvold et al. 2013; Christie et al. 2017; Orozco et al. 2012) to only a few  
tens of eQTL or pQTLs (Foss et al. 2011; Ghazalpour et al. 2011; Albert et al. 2014) or even no  
304 hotspot at all (Mähler et al. 2017). In our study, false hotspot detection was limited by having a high  
mapping resolution and by using a pQTL clustering method that takes into account LD variations  
306 across the genome (Negro et al. 2019). Based on co-localization with coQTLs, we ultimately cross-  
validated 15 condition-specific hotspots, suggesting that loci with pleiotropic effects on the  
308 proteome can interact with the environment.

By analyzing a diversity panel of 254 genotypes, we showed that many small changes in  
310 protein abundance, detected as significant because they occurred in a high number of genotypes,  
contributed to extensively remodel the proteome in water deficit conditions. In total, approximately  
312 75% of quantified proteins responded significantly to environmental change. Up- and down  
regulated proteins were well differentiated in terms of function, and indicated that the  
314 photosynthetic, transcriptional and translational machineries were slowed down while stress  
responses and signalization mechanisms were activated. All these changes showed that plants  
316 clearly perceived a lack of water and presented a coordinated proteome response to water deficit.

Changes in abundance occurring in response to water deficit were associated with changes in  
318 the structure of the co-expression network. Indeed, we identified condition-specific modules, one of  
which, in the WD condition, was significantly enriched for stress-response proteins. Similarly,  
320 Munkvold et al. (2013) observed condition-specific modules related to biological processes in  
response to particular environmental conditions. Such modules suggest that, under environmental  
322 perturbation, sets of genes or proteins are collectively mobilized by condition-specific factors  
allowing plant cells to adapt. The WD-specific module was associated with several QTL/coQTL  
324 colocalizations and its eigengene was highly correlated with biomass, water use and leaf area.  
Although the approach used here is correlative, these results suggest that, under water deficit,  
326 stress-response proteins contribute to phenotypic responses, which is consistent with the fact that  
many QTL/pQTL co-localizations involved these types of proteins. One coQTL for the WD-specific  
328 module was located in a region of Chromosome 5 that also cumulated several QTLs, pQTLs and the  
hotspot Hs52d. This indicates that the co-expression observed for stress response proteins may be  
330 driven by condition-specific factors, the pleiotropic effects of which resonate across all layers of  
biological complexity up to phenotype. Altogether, these results suggest that an eigengene may be  
332 considered a more integrated molecular trait than protein abundance, and can help decipher the  
genotype-phenotype relationship by bridging the gap between the proteomic and phenotypic level.

334 Linking phenotypic variation to proteome variation revealed many QTL/pQTL co-  
localizations for which, using high mapping resolution, we identified a limited number of candidate  
336 genes.

Only two of the 69 QTLs detected in the WW condition, vs 39 of the 91 in the WD condition,  
338 co-localized with pQTLs. This difference could be explained by the hypothesis that under non-  
stress conditions, phenotypic variations are driven by many low contribution proteins, whose  
340 abundance is probably controlled by low effect genetic polymorphisms, whereas under water stress,  
phenotypic variations are mainly driven by stress response proteins under the genetic control of  
342 condition-specific factors. In agreement with this hypothesis, we robustly identified two genomic  
regions that could correspond to such factors. The first is located on Chromosome 7, where we  
344 identified *ZmGH3.8* as the sole candidate gene underlying two QTLs (for leaf area and water use),  
seven pQTLs, of which five were associated with proteins involved in stress responses, and two  
346 coQTLs, one of which was associated with the WD-specific module. In maize shoots, Feng et al.  
(2015) showed that the expression of *ZmGH3.8* was induced by auxin and reduced under  
348 polyethylene glycol treatment. The second region is located on Chromosome 5, in the region of the  
Hs52d hotspot, where we identified an SBP gene (GRMZM2G111136) and a C2C2-CO-like gene  
350 (GRMZM2G148772) as candidate genes underlying four QTLs, six pQTLs and one coQTLs. These  
two transcription factors have been previously shown to be induced by drought in maize (Mao et al.  
352 2016; Forestan et al. 2016). In addition, SBP genes constitute a functionally diverse family of  
transcription factors involved in plant growth and development (Preston and Hileman 2013). Due to  
354 their potential implication in GxE interactions and because of their roles both in plant growth and  
development and in drought response, *ZmWRKY48*, *ZmGH3.8*, SBP and C2C2-CO-like genes  
356 represent promising candidates for drought tolerance breeding.

To conclude, our systems genetics approach which incorporates MS-based proteomics data  
358 has yielded several new results regarding the drought response in maize. First, we point out that the  
strength of the genetic control over protein abundance is related to protein function and also

360 probably to the evolutionary constraints on protein expression. Then, we show that even mild water  
deficit strongly remodels the proteome and induces a reprogramming of the genetic control of the  
362 abundance of many proteins and notably those involved in stress responses. QTL/pQTL co-  
localizations are mostly found in the WD condition indicating that this reprogramming also affects  
364 the phenotypic level. Finally, we identify candidate genes that are potentially responsible for both  
the co-expression of stress-response proteins and the variation of ecophysiological traits under  
366 water deficit. Taken together, our findings provide novel insights into the molecular mechanisms of  
drought tolerance and suggest some pathways for further research and breeding. Our study also  
368 demonstrates that proteomics has now reached enough maturity to be fully exploited in systems  
studies necessitating large-scale experiments.



## 370 **METHODS**

### 372 **Plant material and experiment**

Plant material and growth conditions are described in full details in Prado et al. (2018) and in  
374 the Supplemental Methods. In brief, a diversity panel of maize hybrids was obtained by crossing a  
common flint parent (UH007, paternal parent) with 254 dent lines. Two levels of soil water content  
376 were applied: well-watered (soil water potential of -0.05 MPa) and water deficit (soil water  
potential of -0.45 MPa). Hybrids were replicated three times in each watering condition. Leaf  
378 sampling was performed at the pre-flowering stage in two replicates per hybrid and water condition.

### 380 **Protein extraction and digestion**

Protein extraction and digestion procedures are described in full detail in the Supplemental  
382 Methods. In brief, proteins were extracted from frozen ground leaf samples using a standard  
protocol for protein precipitation with trichloroacetic acid and acetone solution. Tryptic digestion  
384 was performed after solubilization, reduction and alkylation of the proteins. The resulting peptides  
were desalted by solid phase extraction using polymeric C18 columns.

386

### **LC-MS/MS analyses**

388 Samples were analyzed by LC-MS/MS in batches of 96. Analyses were performed using a  
NanoLC-Ultra System (nano2DUltra, Eksigent, Les Ulis, France) connected to a Q-Exactive mass  
390 spectrometer (Thermo Electron, Waltham, MA, USA). A 400 ng protein digest was loaded at  
7.5  $\mu\text{l}\cdot\text{min}^{-1}$  on a Biosphere C18 pre-column (0.3  $\times$  5 mm, 100 Å, 5  $\mu\text{m}$ ; Nanoseparation,  
392 Nieuwkoop, Netherlands) and desalted with 0.1% formic acid and 2% ACN. After 3 min, the pre-  
column was connected to a Biosphere C18 nanocolumn (0.075  $\times$  150 mm, 100 Å, 3  $\mu\text{m}$ ,  
394 Nanoseparation). Buffers were 0.1% formic acid in water (A) and 0.1% formic acid and 100% ACN  
(B). Peptides were separated using a linear gradient from 5 to 35% buffer B for 40 min at 300

396 nl.min<sup>-1</sup>. One run took 60 min, including the regeneration step at 95% buffer B and the equilibration  
step at 95% buffer A. Ionization was performed with a 1.4-kV spray voltage applied to an uncoated  
398 capillary probe (10 µm tip inner diameter; New Objective, Woburn, MA, USA). Peptide ions were  
analyzed using Xcalibur 2.2 (Thermo Electron) in a data-dependent acquisition mode as described  
400 in the Supplemental Methods.

## 402 **Peptide and protein identification**

Peptide identification was performed using the MaizeSequence genome database (Release 5a,  
404 136,770 entries, <https://ftp.maizegdb.org/MaizeGDB/FTP/>) supplemented with 1,821 French maize  
inbred line F2 sequences with present/absent variants (PAVs) (Darracq et al. 2018) and a custom  
406 database containing standard contaminants. Database searches were performed using X!Tandem  
(Craig and Beavis 2004) (version 2015.04.01.1) and protein inference was performed using a  
408 homemade C++ version of X!TandemPipeline (Langella et al. 2017) specifically designed to handle  
hundreds of MS run files. Parameters for peptide identification and protein inference are described  
410 in the Supplemental Methods. The false discovery rate (FDR) was estimated at 0.06% for peptides  
and 0.04% for proteins.

412 Functional annotation of proteins was based on MapMan mapping (Thimm et al. 2004; Usadel  
et al. 2009) (Zm\_B73\_5b\_FGS\_cds\_2012 available at <https://mapman.gabipd.org/>) and on a custom  
414 KEGG classification built by manually attributing the MapMan bins to KEGG pathways (Dillmann,  
pers. com.).

416

## **Peptide and protein quantification**

418 Peptide quantification was performed using MassChroQ version 2.1.0 (Valot et al. 2011) based  
on extracted ion chromatograms (XIC) with the parameters described in the Supplemental Methods.  
420 Peptide quantification data were filtered to remove genotypes represented by only one or two  
samples instead of the expected four, as well as outlier samples for which we suspected technical

422 problems during sample preparation or MS analysis. In the end, the MS dataset included 977  
samples.

424 Proteins were quantified from peptides using two complementary methods. *i. XIC-based*  
*quantification:* Proteins were quantified based on peptide intensity data filtered and normalized as  
426 described in the Supplemental Methods. We excluded proteins that were quantified by only one  
peptide. As samples were analyzed by LC-MS/MS in batches over a period of several months, we  
428 observed a strong batch effect on normalized peptide intensities. To correct this batch effect, we  
fitted a linear model to log-transformed intensity data and subtracted the component due to batch  
430 effects. Then, for each protein, we modeled the peptide data using a mixed-effects model derived  
from Blein-Nicolas et al. (2012) and described in the Supplemental Methods. Protein abundance  
432 was subsequently computed as adjusted means from the model's estimates. *ii. Spectral counting*  
*(SC)-based quantification:* Proteins that could not be quantified with XIC because their peptides  
434 had too many missing intensity values were quantified based on their number of assigned spectra.  
Proteins with a spectral count  $< 2$  in any of the samples were discarded. Normalization was then  
436 performed as described in the Supplemental Methods. As in XIC-based quantification, we corrected  
the batch effect by fitting a linear model to square-root transformed and normalized protein  
438 abundances. Analysis of variance (ANOVA) was subsequently performed using the mixed-effects  
model described in the Supplemental Methods.

440

### **Genome wide association study**

442 GWAS was performed on protein abundances estimated in each watering condition using the  
single locus mixed model described in Yu et al. (2006). The variance-covariance matrix was  
444 determined as described in Rincent et al. (2014) by a kinship matrix derived from all SNPs except  
those on the Chromosome containing the SNP being tested. SNP effects were estimated by  
446 generalized least squares and their significance was tested with an F-statistic. An SNP was

448 considered significantly associated when  $-\log_{10}(P\text{-value}) > 5$ . A set of 961,971 SNPs obtained from  
line genotyping using a 50 K Infinium HD Illumina array (Ganal et al. 2011), a 600 K Axiom  
Affymetrix array (Unterseer et al. 2014) and a set of 500 K SNPs obtained by genotyping-by-  
450 sequencing (Negro et al. 2019) were tested. Analyses were performed with FaST-LMM (Lippert et  
al. 2011) v2.07. Only SNPs with minor allele frequencies  $> 5\%$  were considered.

452 Inflation factors were computed as the slopes of the linear regressions on the QQplots between  
observed  $-\log_{10}(P\text{-value})$  and expected  $-\log_{10}(P\text{-value})$ . Inflation factors were close to 1 (median of  
454 1.08 and 1.06 in the XIC-based and SC-based sets, respectively), indicating low inflation of  $P$ -  
*values*.

456

### **Detection of QTLs from significantly associated SNPs**

458 Three different methods implemented in R (R core team 2013) version 3.3.3 were used to  
summarize significantly associated SNPs into pQTLs. *i. The genetic method*: two contiguous SNPs  
460 were considered to belong to a same QTL when the genetic distance separating them was less than  
0.1 cM. *ii. The LD-based method*: two contiguous SNPs were considered to belong to a same QTL  
462 when their LD-based windows (Negro et al. 2019) overlapped. *iii. The geometric method*: for each  
chromosome, we ordered the SNPs according to their physical position. Then, we smoothed the  
464  $-\log_{10}(P\text{-value})$  signal by computing the maximum of the  $-\log_{10}(P\text{-values})$  in a sliding window  
containing  $N$  consecutive SNPs. An association peak was detected when the smoothed  $-\log_{10}(P$ -  
466  $value)$  signal exceeded a max threshold  $M$ . Two consecutive peaks were considered to be two  
different QTLs when the  $-\log_{10}(P\text{-value})$  signal separating them dropped below a min threshold  $m$ .  
468 The parameters for QTL detection were fixed empirically at  $N=500$ ,  $M=5$  and  $m=4$ . For the three  
methods described above, the position of a QTL was determined by the SNP exhibiting the highest  
470  $-\log_{10}(P\text{-value})$ . A pQTL was considered local if it was within 1 Mb upstream or downstream of the  
coding sequence of the gene encoding the corresponding protein.

472

## Complementary data analyses

474 The following complementary data analyses were performed with R (R core team 2013)  
version 3.3.3. *i. Broad sense heritability of protein abundance:* For each protein, the broad sense  
476 heritability of abundance was computed for each of the two watering conditions from a mixed-  
effects model as described in the Supplemental Methods. *ii. detection of pQTL hotspots:* for each  
478 SNP position, we counted the number of pQTLs ( $N$ ) located within its LD-based window (Negro et  
al. 2019). The threshold used to detect a hotspot was set at the 97% quantile of the distribution of  $N$ .  
480 *iii. Protein co-expression analysis:* Protein co-expression analysis was performed using the  
WGCNA R package (Langfelder and Horvath 2008) with the parameters described in the  
482 Supplemental Methods. Using a procedure developed to correct the bias due to population structure  
and/or relatedness in the LD measure and implemented in the LDcorSV R package (Mangin et al.  
484 2012), we computed pair-wise Pearson's correlations corrected by structure and kinship ( $|r_{corrected}|$ )  
and used them as the input similarity matrix. Graphical representations of the resulting networks  
486 were performed with Cytoscape (Shannon et al. 2003) v3.5.1 using an unweighted spring embedded  
layout. *iv. QTL co-localization:* We considered QTLs to co-localize when they meet the following  
488 two criteria. First, the LD-based windows around the QTLs (Negro et al. 2019) should overlap.  
Second, the absolute value of the Pearson's correlation of coefficient corrected by structure and  
490 kinship (the  $|r_{corrected}|$  mentioned above) between the values of the ecophysiological traits associated  
with the QTLs should be greater than 0.3. We determined this value empirically, in the absence of a  
492 statistical test to test the significance of the corrected correlation. *v. Candidate gene identification:*  
For each QTL/pQTL co-localization, gene accessions found within the interval defined by the  
494 intersection between the LD-based windows around the QTL and the pQTL were retrieved from the  
MaizeSequence genome database (Release 5a). Low confidence gene models and transposable  
496 elements were not considered.

## 498 DATA ACCESS

The raw MS output files were deposited online using PROTIcDb (Langella et al. 2007; Ferry-  
500 Dumazet et al. 2005; Langella et al. 2013) at the following URL:  
<http://moulon.inra.fr/protic/amaizing> (DOI 10.15454/1.5736519296148652E12, currently available  
502 with the following username: reviewer and password: reviewer) and at MassIVE at the following  
URL: <ftp://MSV000084619@massive.ucsd.edu> ([doi:10.25345/C5Q684](https://doi.org/10.25345/C5Q684)). They will be made freely  
504 available after publication. Detailed information on all peptides and proteins identified in the LC-  
MS/MS runs as well as peptide intensities and protein abundances obtained for each sample are also  
506 freely available on PROTIcDb at the same URL.

Phenotypic data are available online using the PHIS information system (Neveu et al. 2019) at  
508 the following URL: [http://www.phis.inra.fr/openphis/web/index.php?r=project  
%2Fview&id=Systems+genetics+for+maize+drought+tolerance+%28Amaizing+project%29](http://www.phis.inra.fr/openphis/web/index.php?r=project%2Fview&id=Systems+genetics+for+maize+drought+tolerance+%28Amaizing+project%29).  
510 Early leaf area (LA<sub>e</sub>) was defined at the seven leaves stage, representing 24 d<sub>20°C</sub> (thermal time in  
equivalent days at 20°C). Late leaf area (LA<sub>l</sub>) was defined at the 12 leaves stage, representing 45  
512 d<sub>20°C</sub>.

Genotyping data are available at the following URL: <https://doi.org/10.15454/GAHEU0>

## 514 **ACKNOWLEDGMENTS**

This work was supported by the Agence Nationale de la Recherche project ANT-10-BTBR-01  
516 (Amazing). Proteomics analyses were performed on the PAPPSO platform (<http://pappso.inra.fr>)  
which is supported by INRA (<http://www.inra.fr>), the Ile-de-France regional council  
518 (<https://www.iledefrance.fr/education-recherche>), IBiSA (<https://www.ibisa.net>) and Saclay Plant  
Sciences-SPS (ANR-17-EUR-0007). The authors want to thank Sylvie Coursol for her critical  
520 review of the manuscript, H el ene Corti for her help in sample preparation and Olivier Langella for  
having specially developed a pipeline to upload the proteomics data on ProticDB. They are also  
522 grateful to people from INRA LEPSE: Fran ois Tardieu for his contribution to the coordination of  
the plant experiment; Beno t Suard, Pauline Sidawi and Olivier Martin for their technical assistance  
524 during the experiment; Santiago Alvarez Prado for his contribution to plant traits and QTL analysis.

526

## **AUTHORS CONTRIBUTION**

528 AC and MZ designed the research; CW designed and coordinated the plant experiment in  
PhenoArch and the genetic analysis of plant traits; LBC performed the plant experiment and  
530 analyzed the image-based phenotypic data; MBN and TB performed the proteomics experiments;  
SSN developed the GWAS pipeline and performed the genotyping quality control; SDN performed  
532 the genotyping and estimated local LD; MBN and MZ analyzed the proteomics data, MBN  
performed the systems genetics study and wrote the manuscript. All authors discussed the results  
534 and read and approved the final manuscript.

## 536 **DISCLOSURE DECLARATION**

The authors declare no competing interest.

## 538 REFERENCES

- Albert FW, Treusch S, Shockley AH, Bloom JS, Kruglyak L. 2014. Genetics of single-cell protein abundance variation in large yeast populations. *Nature* **506**: 494–497.
- Albertin W, Marullo P, Bely M, Aigle M, Bourgeois A, Langella O, Balliau T, Chevret D, Valot B, da Silva T, et al. 2013. Linking post-translational modifications and variation of phenotypic traits. *Mol Cell Proteomics* **12**: 720–735.
- Balliau T, Blein-Nicolas M, Zivy M. 2018. Evaluation of optimized tube-gel methods of sample preparation for large-scale plant proteomics. *Proteomes* **6**.
- Basnet RK, Del Carpio DP, Xiao D, Bucher J, Jin M, Boyle K, Fobert P, Visser RGF, Maliepaard C, Bonnema G. 2016. A systems genetics approach identifies gene regulatory networks associated with fatty acid composition in *Brassica rapa* seed. *Plant Physiol* **170**: 568–585.
- Battle A, Khan Z, Wang SH, Mitrano A, Ford MJ, Pritchard JK, Gilad Y. 2015. Impact of regulatory variation from RNA to protein. *Science* **347**: 664–667.
- Blein-Nicolas M, Albertin W, da Silva T, Valot B, Balliau T, Masneuf-Pomarède I, Bely M, Marullo P, Sicard D, Dillmann C, et al. 2015. A systems approach to elucidate heterosis of protein abundances in yeast. *Mol Cell Proteomics* **14**: 2056–2071.
- Blein-Nicolas M, Xu H, de Vienne D, Giraud C, Huet S, Zivy M. 2012. Including shared peptides for estimating protein abundances: A significant improvement for quantitative proteomics. *Proteomics* **12**: 2797–2801.
- Bourgeois M, Jacquin F, Cassecuelle F, Savoie V, Belghazi M, Aubert G, Quillien L, Huart M, Marget P, Burstin J. 2011. A PQL (protein quantity loci) analysis of mature pea seed proteins identifies loci determining seed protein composition. *Proteomics* **11**: 1581–1594.
- Campos H, Cooper M, Edmeades GO, Löffler CM, Schussler JR, Ibáñez M. 2006. Changes in drought tolerance in maize associated with fifty years of breeding for yield in the US Corn Belt. *Maydica* **51**: 369–381.
- Campos H, Cooper M, Habben JE, Edmeades GO, Schussler JR. 2004. Improving drought tolerance in maize: a view from industry *Field Crops Res* **90**: 19–34.
- Chaves MM, Maroco JP, Pereira JS. 2003. Understanding plant responses to drought — from genes to the whole plant. *Funct Plant Biol* **30**: 239–264.
- Chick JM, Munger SC, Simecek P, Huttlin EL, Choi K, Gatti DM, Raghupathy N, Svenson KL, Churchill GA, Gygi SP. 2016. Defining the consequences of genetic variation on a proteome-wide scale. *Nature* **534**: 500–505.
- Christie N, Myburg AA, Joubert F, Murray SL, Carstens M, Lin Y-C, Meyer J, Crampton BG, Christensen SA, Ntuli JF, et al. 2017. Systems genetics reveals a transcriptional network associated with susceptibility in the maize–grey leaf spot pathosystem. *Plant J* **89**: 746–763.
- Civelek M, Lusk AJ. 2014. Systems genetics approaches to understand complex traits. *Nat Rev Genet* **15**: 34–48.
- Cooper M, Ghore C, Leafgren R, Tang T, Messina C. 2014. Breeding drought-tolerant maize hybrids for the US corn-belt: discovery to product. *J Exp Bot* **65**: 6191–6204.
- Craig R, Beavis RC. 2004. TANDEM: matching proteins with tandem mass spectra. *Bioinformatics* **20**: 1466–1467.
- Darracq A, Vitte C, Nicolas S, Duarte J, Pichon J-P, Mary-Huard T, Chevalier C, Bérard A, Le Paslier M-C, Rogowsky P, et al. 2018. Sequence analysis of European maize inbred line F2 provides new insights into molecular and chromosomal characteristics of presence/absence variants. *BMC Genomics* **19**.
- Daryanto S, Wang L, Jacinthe P-A. 2016. Global synthesis of drought effects on maize and wheat production. *PLoS ONE* **11**.



- de Vienne D, Leonardi A, Damerval C, Zivy M. 1999. Genetics of proteome variation for QTL characterization: application to drought-stress responses in maize. *J Exp Bot* **50**: 303–309.
- Feltus FA. 2014. Systems genetics: a paradigm to improve discovery of candidate genes and mechanisms underlying complex traits. *Plant Sci* **223**: 45–48.
- Feng S, Yue R, Tao S, Yang Y, Zhang L, Xu M, Wang H, Shen C. 2015. Genome-wide identification, expression analysis of auxin-responsive GH3 family genes in maize (*Zea mays* L.) under abiotic stresses. *J Integr Plant Biol* **57**: 783–795.
- Ferry-Dumazet H, Houel G, Montalent P, Moreau L, Langella O, Negroni L, Vincent D, Lalanne C, de Daruvar A, Plomion C, et al. 2005. PROTICdb: A web-based application to store, track, query, and compare plant proteome data. *Proteomics* **5**: 2069–2081.
- Forestan C, Aiese Cigliano R, Farinati S, Lunardon A, Sanseverino W, Varotto S. 2016. Stress-induced and epigenetic-mediated maize transcriptome regulation study by means of transcriptome reannotation and differential expression analysis. *Sci Rep* **6**: 30446.
- Foss EJ, Radulovic D, Shaffer SA, Goodlett DR, Kruglyak L, Bedalov A. 2011. Genetic variation shapes protein networks mainly through non-transcriptional mechanisms. *PLoS Biol* **9**: e1001144.
- Ganal MW, Durstewitz G, Polley A, Bérard A, Buckler ES, Charcosset A, Clarke JD, Graner E-M, Hansen M, Joets J, et al. 2011. A large maize (*Zea mays* L.) SNP genotyping array: Development and germplasm genotyping, and genetic mapping to compare with the B73 reference genome. *PLoS ONE* **6**: e28334.
- Ghazalpour A, Bennett B, Petyuk VA, Orozco L, Hagopian R, Mungrue IN, Farber CR, Sinsheimer J, Kang HM, Furlotte N, et al. 2011. Comparative analysis of proteome and transcriptome variation in mouse. *PLoS Genet* **7**: e1001393.
- Goldman AD, Samudrala R, Baross JA. 2010. The evolution and functional repertoire of translation proteins following the origin of life. *Biol Direct* **5**: 15.
- Gollack D, Li C, Mohan H, Probst N. 2014. Tolerance to drought and salt stress in plants: Unraveling the signaling networks. *Front Plant Sci* **5**.
- Harrison MT, Tardieu F, Dong Z, Messina CD, Hammer GL. 2014. Characterizing drought stress and trait influence on maize yield under current and future conditions. *Glob Change Biol* **20**: 867–878.
- Jiang L-G, Li B, Liu S-X, Wang H-W, Li C-P, Song S-H, Beatty M, Zastrow-Hayes G, Yang X-H, Qin F, et al. 2019. Characterization of proteome variation during modern maize breeding. *Mol Cell Proteomics* **18**: 263–276.
- Keshishian H, Burgess MW, Specht H, Wallace L, Clauser KR, Gillette MA, Carr SA. 2017. Quantitative, multiplexed workflow for deep analysis of human blood plasma and biomarker discovery by mass spectrometry. *Nat Protoc* **12**: 1683–1701.
- Langella O, Valot B, Balliau T, Blein-Nicolas M, Bonhomme L, Zivy M. 2017. X!TandemPipeline: A tool to manage sequence redundancy for protein inference and phosphosite identification. *J Proteome Res* **16**: 494–503.
- Langella O, Valot B, Jacob D, Balliau T, Flores R, Hoogland C, Joets J, Zivy M. 2013. Management and dissemination of MS proteomic data with PROTICdb: example of a quantitative comparison between methods of protein extraction. *Proteomics* **13**: 1457–1466.
- Langella O, Zivy M, Joets J. 2007. The PROTICdb database for 2-DE proteomics. *Methods Mol Biol* **355**: 279–303.
- Langfelder P, Horvath S. 2008. WGCNA: an R package for weighted correlation network analysis. *BMC Bioinformatics* **9**: 559.
- Lippert C, Listgarten J, Liu Y, Kadie CM, Davidson RI, Heckerman D. 2011. FaST linear mixed models for genome-wide association studies. *Nat Methods* **8**: 833–835.

- Lobell DB, Roberts MJ, Schlenker W, Braun N, Little BB, Rejesus RM, Hammer GL. 2014. Greater sensitivity to drought accompanies maize yield increase in the U.S. midwest. *Science* **344**: 516–519.
- Mähler N, Wang J, Terebieniec BK, Ingvarsson PK, Street NR, Hvidsten TR. 2017. Gene co-expression network connectivity is an important determinant of selective constraint. *PLoS Genet* **13**: e1006402.
- Mangin B, Siberchicot A, Nicolas S, Doligez A, This P, Cierco-Ayrolles C. 2012. Novel measures of linkage disequilibrium that correct the bias due to population structure and relatedness. *Heredity* **108**: 285–291.
- Mao H-D, Yu L-J, Li Z-J, Yan Y, Han R, Liu H, Ma M. 2016. Genome-wide analysis of the SPL family transcription factors and their responses to abiotic stresses in maize. *Plant Gene* **6**: 1–12.
- Markowitz F, Boutros M. 2015. An introduction to systems genetics. In *Systems Genetics* (eds. F. Markowitz and M. Boutros), pp. 1–11, Cambridge University Press, doi:10.1017/CBO9781139012751.001
- Meng Q, Chen X, Lobell DB, Cui Z, Zhang Y, Yang H, Zhang F. 2016. Growing sensitivity of maize to water scarcity under climate change. *Sci Rep* **6**: 19605.
- Mizrachi E, Verbeke L, Christie N, Fierro AC, Mansfield SD, Davis MF, Gjersing E, Tuskan GA, Montagu MV, Peer YV de, et al. 2017. Network-based integration of systems genetics data reveals pathways associated with lignocellulosic biomass accumulation and processing. *Proc Natl Acad Sci* **114**: 1195–1200.
- Moreno-Moral A, Petretto E. 2016. From integrative genomics to systems genetics in the rat to link genotypes to phenotypes. *Dis Model Mech* **9**: 1097–1110.
- Munkvold JD, Laudencia-Chinguanco D, Sorrells ME. 2013. Systems genetics of environmental response in the mature wheat embryo. *Genetics* **194**: 265–277.
- Nadeau JH, Dudley AM. 2011. Systems genetics. *Science* **331**: 1015–1016.
- Negro SS, Millet EJ, Madur D, Bauland C, Combes V, Welcker C, Tardieu F, Charcosset A, Nicolas SD. 2019. Genotyping-by-sequencing and SNP-arrays are complementary for detecting quantitative trait loci by tagging different haplotypes in association studies. *BMC Plant Biol* **19**: 318.
- Nelson N, Junge W. 2015. Structure and energy transfer in photosystems of oxygenic photosynthesis. *Annu Rev Biochem* **84**: 659–683.
- Neveu P, Tireau A, Hilgert N, Nègre V, Mineau-Cesari J, Brichet N, Chapuis R, Sanchez I, Pommier C, Charnomordic B, et al. 2019. Dealing with multi-source and multi-scale information in plant phenomics: the ontology-driven Phenotyping Hybrid Information System. *New Phytol* **221**: 588–601.
- Orozco LD, Bennett BJ, Farber CR, Ghazalpour A, Pan C, Che N, Wen P, Qi HX, Mutukulu A, Siemers N, et al. 2012. Unraveling inflammatory responses using systems genetics and gene-environment interactions in macrophages. *Cell* **151**: 658–670.
- Osakabe Y, Osakabe K, Shinozaki K, Tran L-SP. 2014. Response of plants to water stress. *Front Plant Sci* **5**.
- Popadin KY, Gutierrez-Arcelus M, Lappalainen T, Buil A, Steinberg J, Nikolaev SI, Lukowski SW, Bazykin GA, Seplyarskiy VB, Ioannidis P, et al. 2014. Gene age predicts the strength of purifying selection acting on gene expression variation in humans. *Am J Hum Genet* **95**: 660–674.
- Prado SA, Cabrera-Bosquet L, Grau A, Coupel-Ledru A, Millet EJ, Welcker C, Tardieu F. 2018. Phenomics allows identification of genomic regions affecting maize stomatal conductance with conditional effects of water deficit and evaporative demand. *Plant Cell Environ* **41**: 314–326.
- Preston JC, Hileman LC. 2013. Functional Evolution in the Plant SQUAMOSA-PROMOTER BINDING PROTEIN-LIKE (SPL) Gene Family. *Front Plant Sci* **4**: 80.
- R core team. 2013. R: A language and environment for statistical computing. R Foundation for Statistical Computing, Vienna, Austria.

- Rincent R, Moreau L, Monod H, Kuhn E, Melchinger AE, Malvar RA, Moreno-Gonzalez J, Nicolas S, Madur D, Combes V, et al. 2014. Recovering power in association mapping panels with variable levels of linkage disequilibrium. *Genetics* **197**: 375–387.
- Schittenhelm S, Schroetter S. 2014. Comparison of drought tolerance of maize, sweet sorghum and sorghum-sudangrass hybrids. *J Agron Crop Sci* **200**: 46–53.
- Seki M, Umezawa T, Urano K, Shinozaki K. 2007. Regulatory metabolic networks in drought stress responses. *Curr Opin Plant Biol* **10**: 296–302.
- Shannon P, Markiel A, Ozier O, Baliga NS, Wang JT, Ramage D, Amin N, Schwikowski B, Ideker T. 2003. Cytoscape: a software environment for integrated models of biomolecular interaction networks. *Genome Res* **13**: 2498–2504.
- Shiferaw B, Prasanna BM, Hellin J, Bänziger M. 2011. Crops that feed the world 6. Past successes and future challenges to the role played by maize in global food security. *Food Secur* **3**: 307.
- Shinozaki K, Yamaguchi-shinozaki K. 2007. Gene networks involved in drought stress response and tolerance. *J Exp Bot* **58**:221-227.
- Tardieu F, Simonneau T, Muller B. 2018. The physiological basis of drought tolerance in crop plants: A scenario-dependent probabilistic approach. *Annu Rev Plant Biol* **69**: 733–759.
- Thimm O, Bläsing O, Gibon Y, Nagel A, Meyer S, Krüger P, Selbig J, Müller LA, Rhee SY, Stitt M. 2004. Mapman: a user-driven tool to display genomics data sets onto diagrams of metabolic pathways and other biological processes. *Plant J* **37**: 914–939.
- Tripathi P, Rabara RC, Rushton PJ. 2014. A systems biology perspective on the role of WRKY transcription factors in drought responses in plants. *Planta* **239**: 255–266.
- Unterseer S, Bauer E, Haberer G, Seidel M, Knaak C, Ouzunova M, Meitinger T, Strom TM, Fries R, Pausch H, et al. 2014. A powerful tool for genome analysis in maize: development and evaluation of the high density 600 k SNP genotyping array. *BMC Genomics* **15**: 823.
- Usadel B, Poree F, Nagel A, Lohse M, Czedik-Eysenberg A, Stitt M. 2009. A guide to using MapMan to visualize and compare omics data in plants: a case study in the crop species, maize. *Plant Cell Environ* **32**: 1211–1229.
- Valliyodan B, Nguyen HT. 2006. Understanding regulatory networks and engineering for enhanced drought tolerance in plants. *Curr Opin Plant Biol* **9**: 189–195.
- Valot B, Langella O, Nano E, Zivy M. 2011. MassChroQ : A versatile tool for mass spectrometry quantification. *Proteomics* **11**: 3572–3577.
- van der Sijde MR, Ng A, Fu J. 2014. Systems genetics: From GWAS to disease pathways. *Biochim Biophys Acta* **1842**: 1903–1909.
- Vogel C, Marcotte EM. 2012. Insights into the regulation of protein abundance from proteomic and transcriptomic analyses. *Nat Rev Genet* **13**: 227–232.
- Wang X, Cai X, Xu C, Wang Q, Dai S. 2016. Drought-responsive mechanisms in plant leaves revealed by proteomics. *Int J Mol Sci* **17**: 1706.
- Wasinger VC, Zeng M, Yau Y. 2013. Current Status and Advances in Quantitative Proteomic Mass Spectrometry. *Int J Proteomics* 2013:180605
- Yu J, Pressoir G, Briggs WH, Vroh Bi I, Yamasaki M, Doebley JF, McMullen MD, Gaut BS, Nielsen DM, Holland JB, et al. 2006. A unified mixed-model method for association mapping that accounts for multiple levels of relatedness. *Nat Genet* **38**: 203–208.

Zegada-Lizarazu W, Zatta A, Monti A. 2012. Water uptake efficiency and above- and belowground biomass development of sweet sorghum and maize under different water regimes. *Plant Soil* **351**: 47–60.

Zhang J, Yang J-R. 2015. Determinants of the rate of protein sequence evolution. *Nat Rev Genet* **16**: 409–420.

Zipper SC, Qiu J, Kucharik CJ. 2016. Drought effects on US maize and soybean production: spatiotemporal patterns and historical changes. *Environ Res Lett* **11**: 094021.

## 540 **FIGURE LEGENDS**

**Figure 1. Effect of mild water deficit on the proteome.** (A) Heatmap representations of protein  
542 abundances estimated for the XIC-based protein set (left) and the SC-based protein set (right). Each  
line corresponds to a protein and each column to a genotype x watering condition combination. For  
544 each protein, abundance values were scaled and represented by a color code as indicated by the  
color-key bar. Hierarchical clustering of the genotype x watering condition combinations (top) and  
546 of the proteins (left) was built using the 1- Pearson correlation coefficient as the distance and the  
unweighted pair group method with arithmetic mean (UPGMA) as the aggregation method. (B)  
548 Functions of the induced and repressed proteins under water deficit. (C) Abundance profiles of the  
RAB17 dehydrin (GRMZM2G079440 quantified based on the number of spectra) and of a LEA  
550 protein (GRMZM2G352415 quantified based on peptide intensity) in the two watering conditions.  
Genotypes on the x axis were ordered according to the WD/WW abundance ratio. The lists of  
552 genotypes in this order are available in Supplemental Table S2.

554 **Figure 2. Relationship between the mean number of pQTLs per KEGG category and the  
mean heritability per KEGG category.**

556

**Figure 3. Distribution of pQTLs across the genome.** (A) In the well-watered condition. (B) In the  
558 water deficit condition. Each point indicates the number of proteins associated with a pQTL located  
within a given genomic region defined by the linkage disequilibrium interval around an SNP.  
560 Dashed horizontal lines indicate the threshold used to detect pQTL hotspots. Names and positions  
of the pQTL hotspots are indicated above each graph. Asterisks indicate the pQTL hotspots  
562 confidently detected as loci with potential pleiotropic effects (details given in Supplemental Table  
S4).

564

**Figure 4. Graphical representation of the co-expression networks resulting from the WGCNA**

566 **analysis.** Only proteins with an adjacency > 0.02 are shown. The two views were created by  
Cytoscape v3.5.1 using an unweighted, spring-embedded layout (cytoscape files are available in  
568 Supplementary File S1). The colors displayed on each network represent the different modules  
identified by WGCNA. Functional enrichments of modules are indicated with corresponding colors.  
570 Condition-specific modules are circled. Each module contains 35 to 471 proteins.

572 **Figure 5. Genomic position of the co-localizing pQTLs, coQTLs and QTLs.** The positions of the  
fifteen pQTL hotspots confidently identified as loci with potential pleiotropic effects are indicated,  
574 as well as the positions of the most promising candidate genes. Chromosomes are segmented into  
10 Mb bins. Grey dots represent the centromeres and blue dots indicate the position of genomic  
576 regions showing evidences for pleiotropy at both the proteome and phenotype level. Blue lines  
indicate co-localizations with QTLs that are determined by a same SNP.

578 ° WD-specific module, \* co-localization found in the WW condition

**Figure 6. Identification of genomic regions associated with trait variations at multiple scales.**

(A) Distribution of the distances between co-localizing QTLs and pQTLs. (B) Detailed view of the  
582 QTL, pQTL, coQTL detected in the region covered by the Hs52d hotspot on Chromosome 5. Dots  
represent the SNPs determining the position of the QTLs and horizontal bars represent the linkage  
584 disequilibrium-based window around each SNP. Black circles indicate the pQTLs that co-localize  
with QTLs or coQTLs with a high correlation between protein abundance and the phenotypic trait  
586 value or the module eigengene. The position of two transcription factors (an SBP gene,  
GRMZM2G111136, and a C2C2-CO-like transcription factor, GRMZM2G148772) representing  
588 promising candidate genes are indicated.



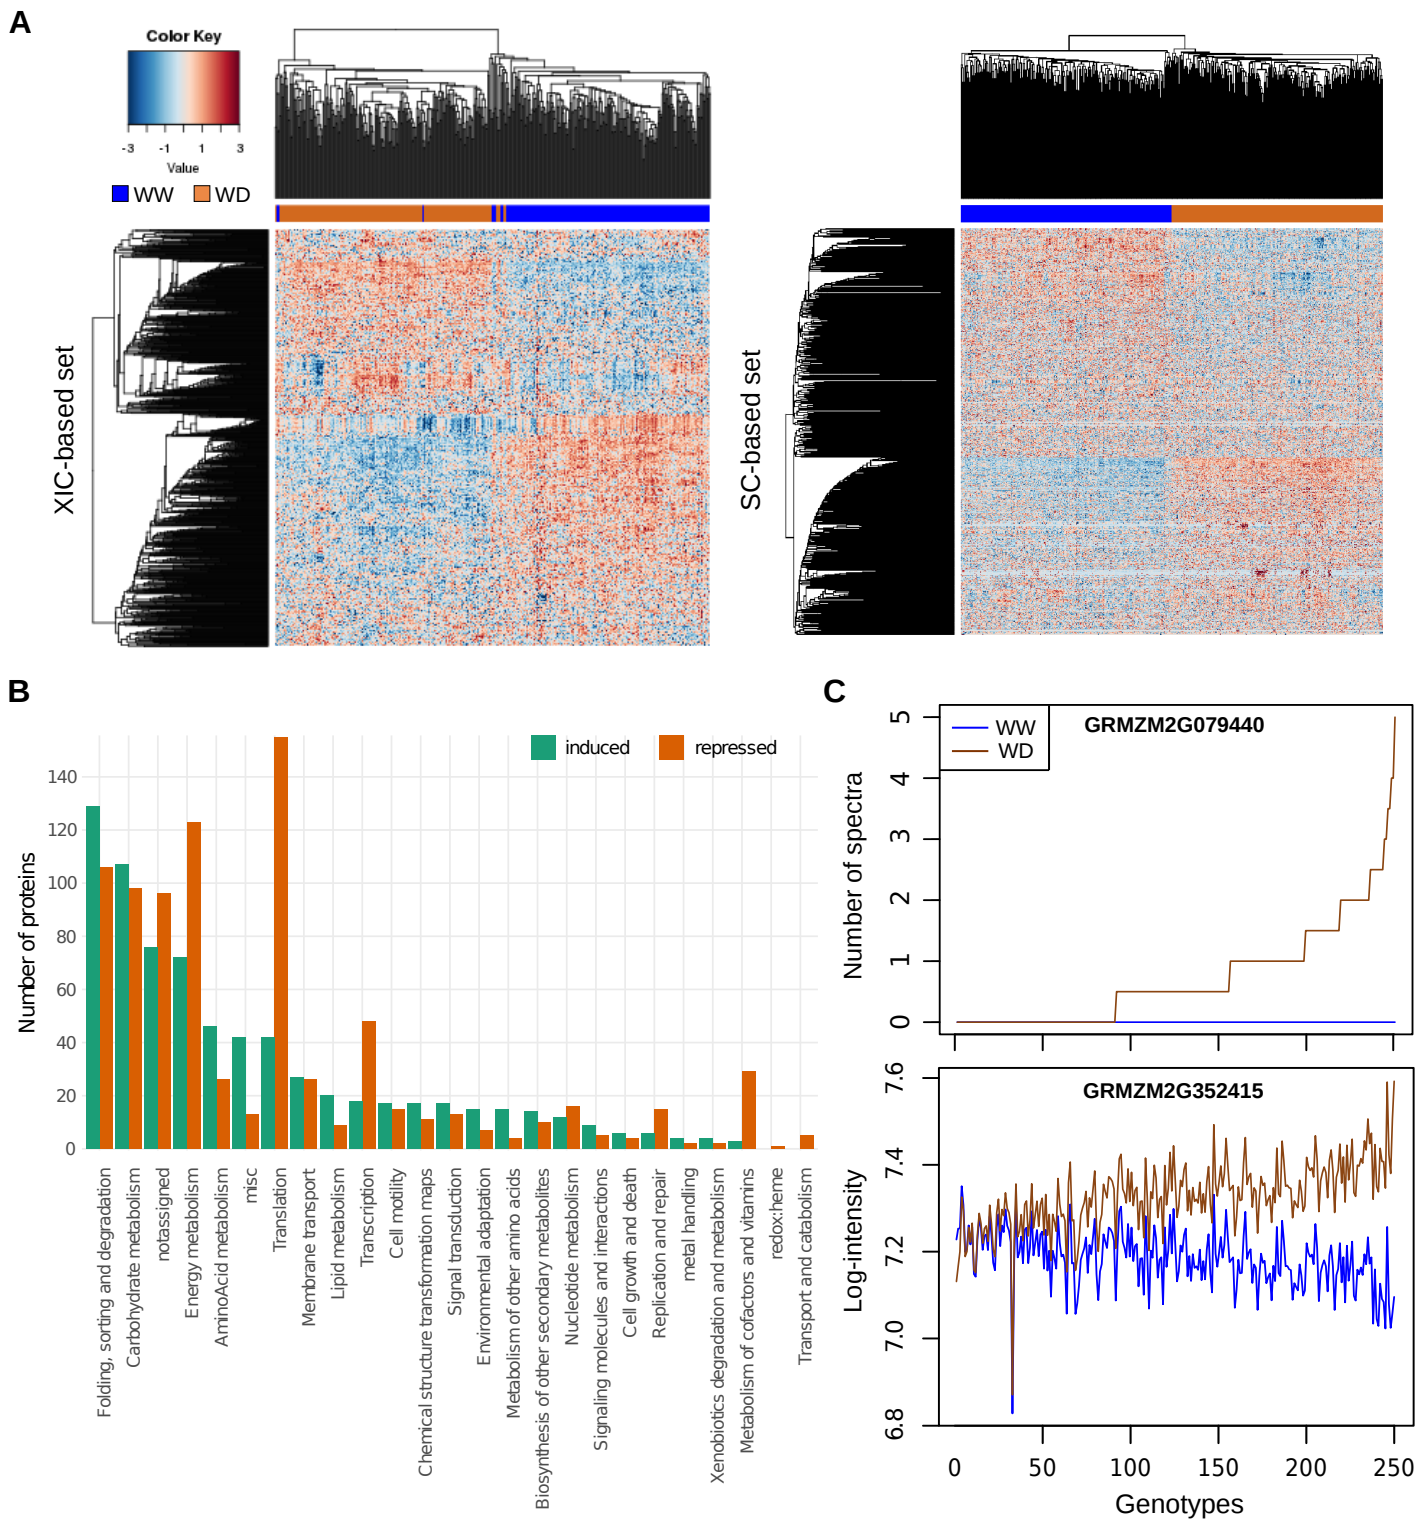

**Figure 1. Effect of a mild water deficit on the proteome.** (A) Heatmap representations of protein abundances estimated for the XIC-based protein set (left) and the SC-based protein set (right). Each line corresponds to a protein and each column to a genotype x watering condition combination. For each protein, abundance values were scaled and represented by a color code as indicated by the color-key bar. Hierarchical clustering of the genotype x watering condition combinations (top) and of the proteins (left) was built using the 1- Pearson correlation coefficient as the distance and the unweighted pair group method with arithmetic mean (UPGMA) as the aggregation method. (B) Functions of induced and repressed proteins under water deficit. (C) Abundance profiles of the RAB17 dehydrin (GRMZM2G079440 quantified based on the number of spectra) and of a LEA protein (GRMZM2G352415 quantified based on peptide intensity) in the two watering conditions. Genotypes on the x axis were ordered according to the WD/WW abundance ratio. The lists of genotypes in this order are available in Supplemental Table S2.

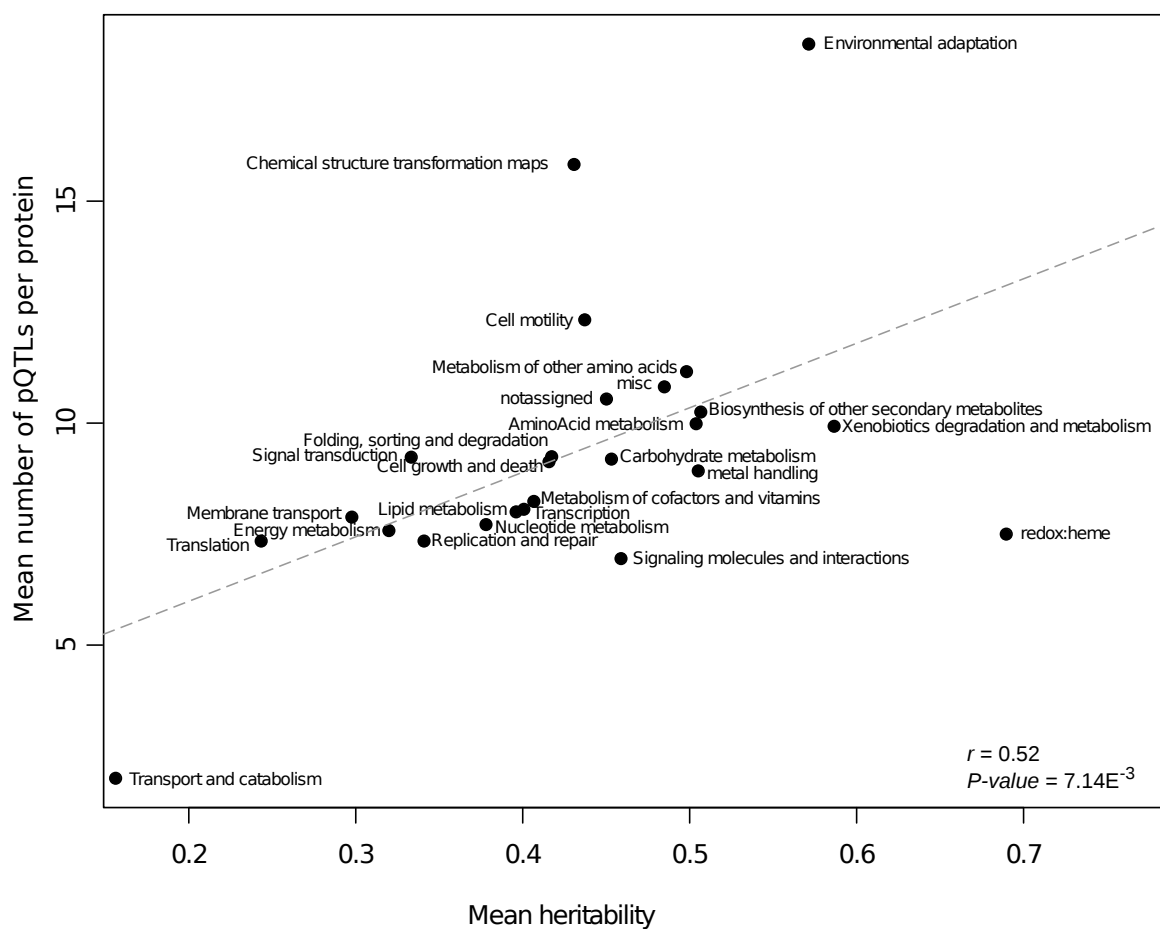

**Figure 2. Relationship between the mean number of pQTLs per KEGG category and the mean heritability per KEGG category.**



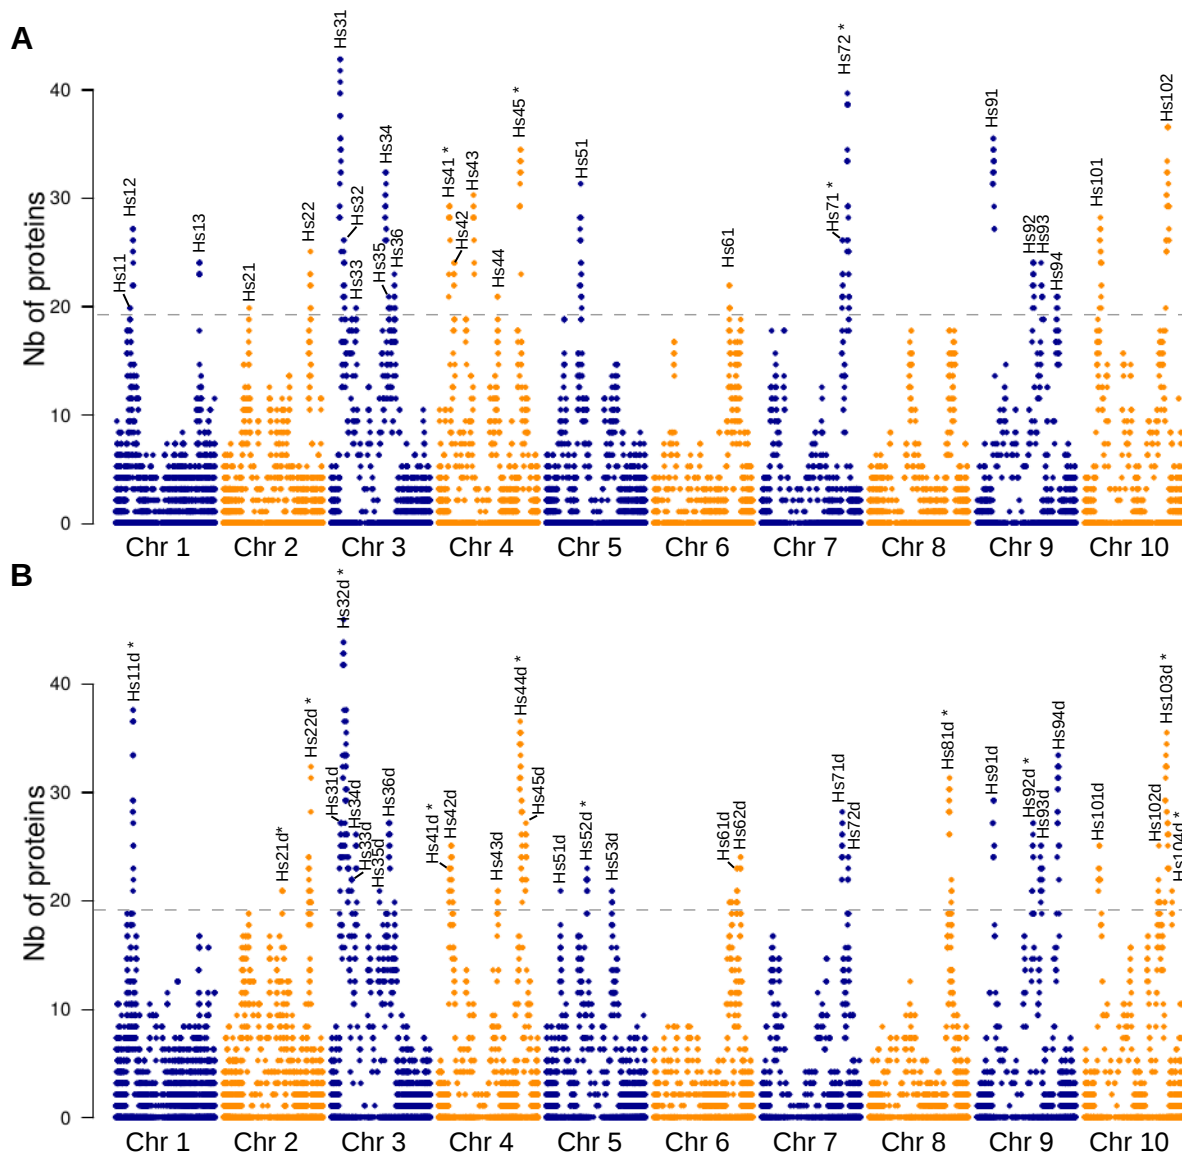

**Figure 3. Distribution of pQTLs across the genome.** (A) In the well-watered condition. (B) In the water deficit condition. Each point indicates the number of proteins controlled by a pQTL located within a given genomic region defined by the linkage disequilibrium interval around an SNP. Dashed horizontal lines indicate the threshold used to detect pQTL hotspots. Names and positions of the pQTL hotspots are indicated above each graph. Asterisks indicate the pQTL hotspots confidently detected as loci with potential pleiotropic effects (details given in Supplemental Table S4).

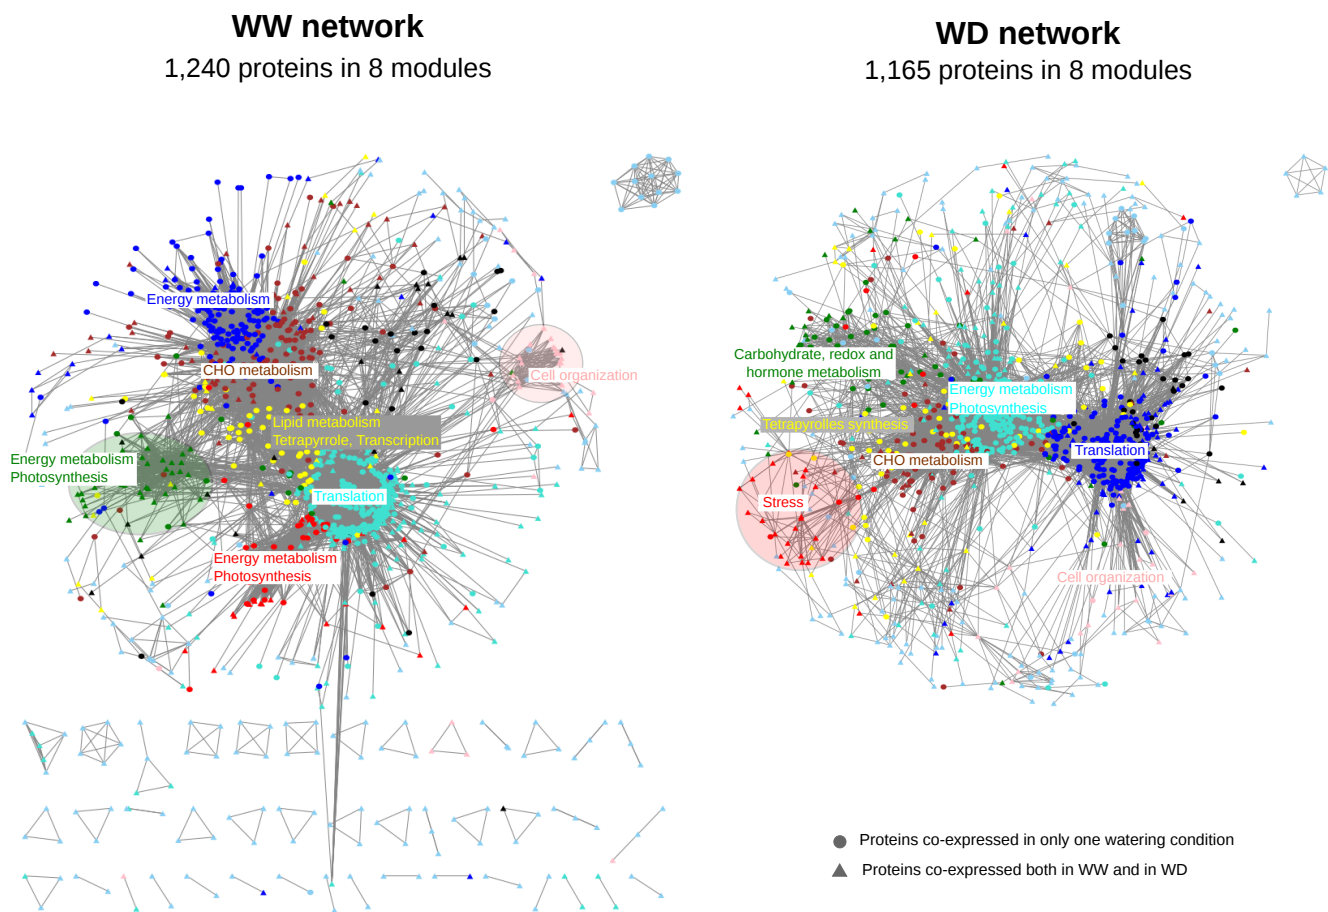

**Figure 4. Graphical representation of the co-expression networks resulting from the WGCNA analysis.** Only proteins with an adjacency  $> 0.02$  are shown. The two views were created by Cytoscape v3.5.1 using an unweighted, spring-embedded layout (cytoscape files are available in Supplementary File S1). The colors displayed on each network represent the different modules identified by WGCNA. Functional enrichments of modules are indicated with corresponding colors. Condition-specific modules are circled. Each module contains 35 to 471 proteins.

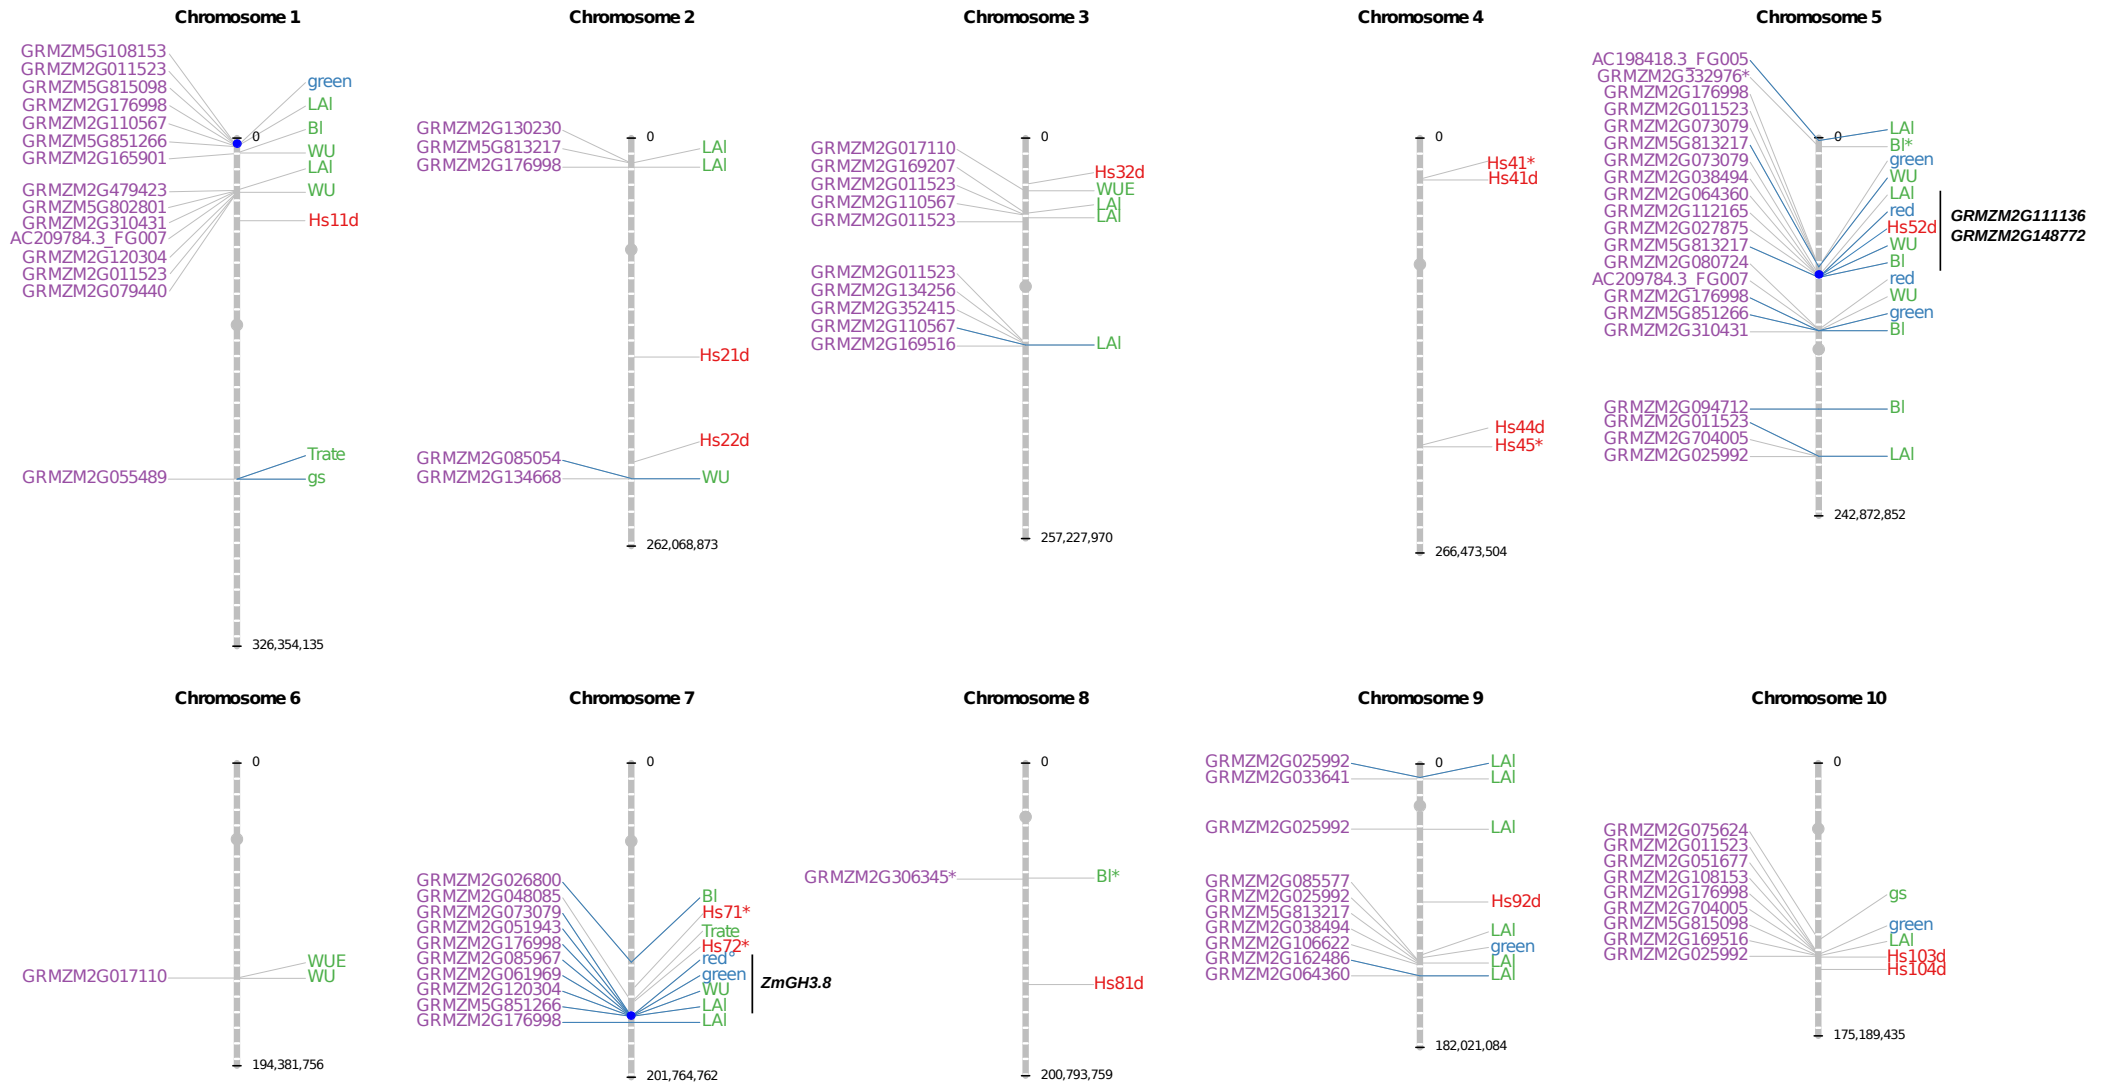

**Figure 5. Genomic positions of the co-localizing pQTLs, coQTLs and QTLs.** The positions of the fifteen pQTL hotspots confidently identified as loci with potential pleiotropic effects are indicated, as well as the position of the most promising candidate genes. Chromosomes are segmented into 10 Mb bins. Grey dots represent the centromeres and blue dots indicate the position of genomic regions showing evidences for pleiotropy at both the proteome and phenotype level. Blue lines indicate co-localizations with QTLs that are determined by a same SNP.

° WD-specific module, \* co-localization found in the WW condition.

A

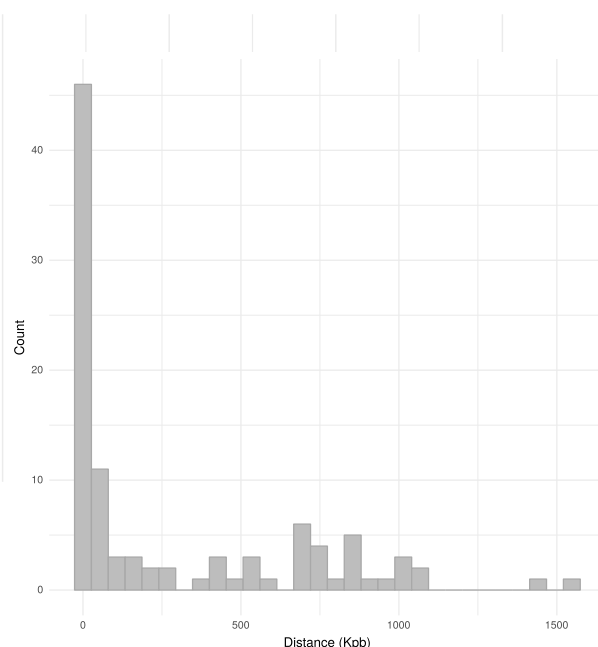

B

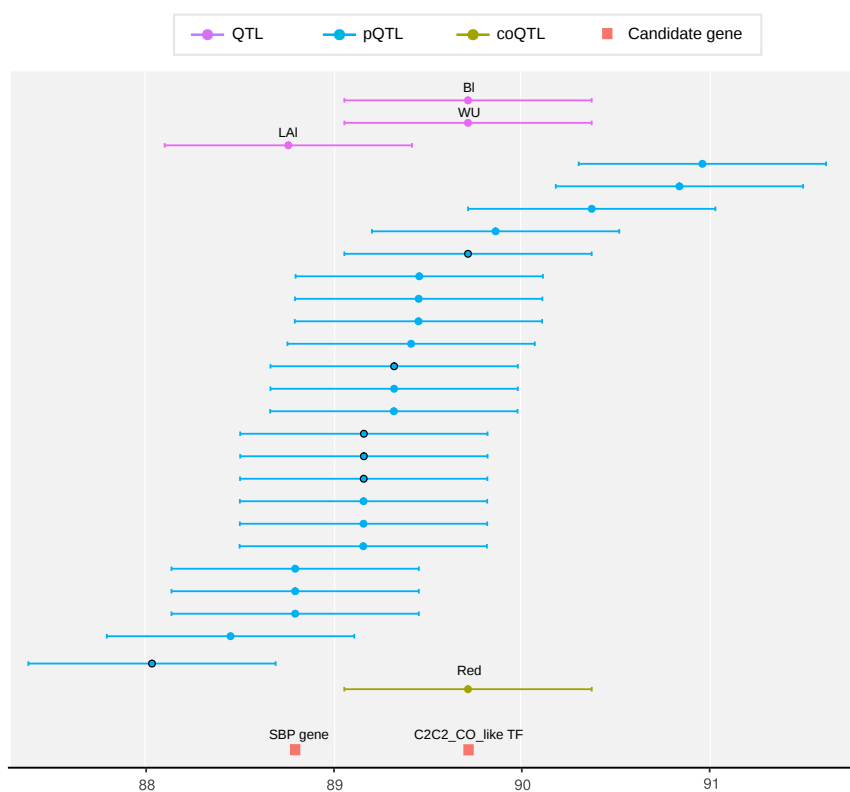

### Figure 6. Identification of genomic regions involved in multi-scale genetic control.

(A) Distribution of the distances between co-localizing QTLs and pQTLs. (B) Detailed view of the QTL, pQTL, coQTL detected in the region covered by the Hs52d hotspot on chromosome 5. Dots represent the SNPs determining the position of the QTLs and horizontal bars represent the linkage disequilibrium-based window around each SNP. Black circles indicate the pQTLs that co-localize with QTLs or coQTLs with a high correlations between the protein abundance and the phenotypic trait value or the module eigengene. The position of two transcription factors (an SBP gene, GRMZM2G111136, and a C2C2-CO-like transcription factor, GRMZM2G148772) representing promising candidate genes are indicated.

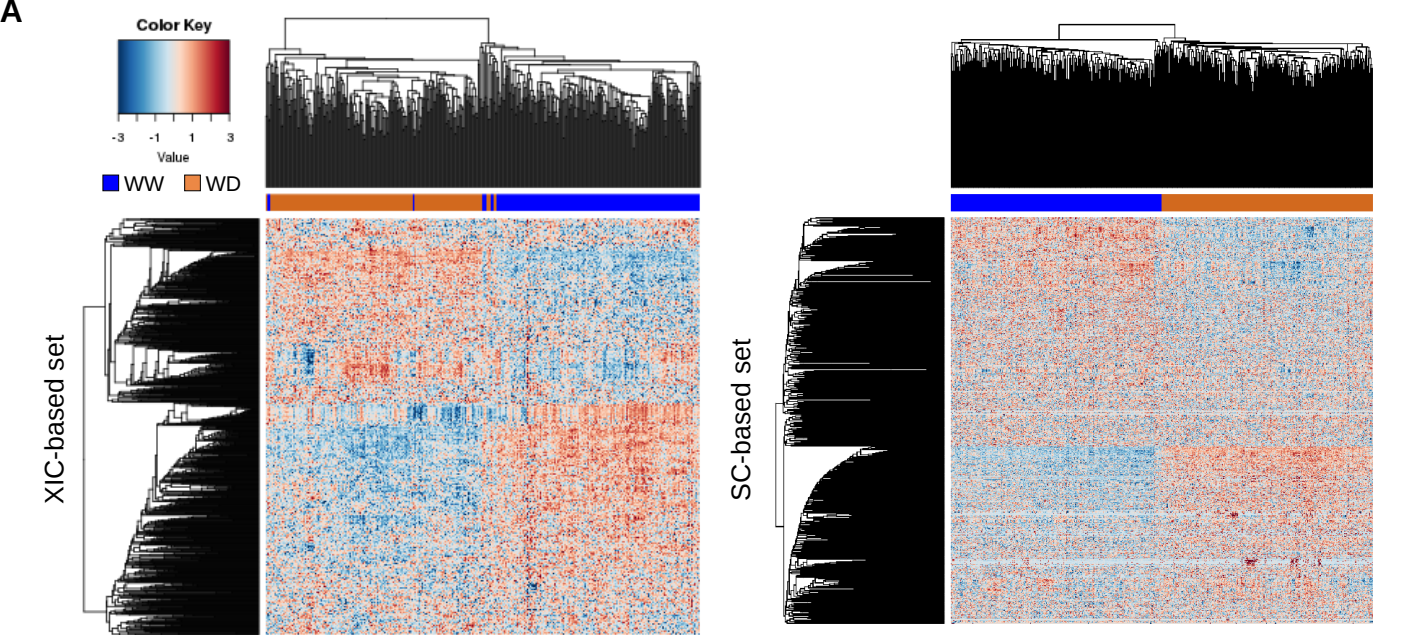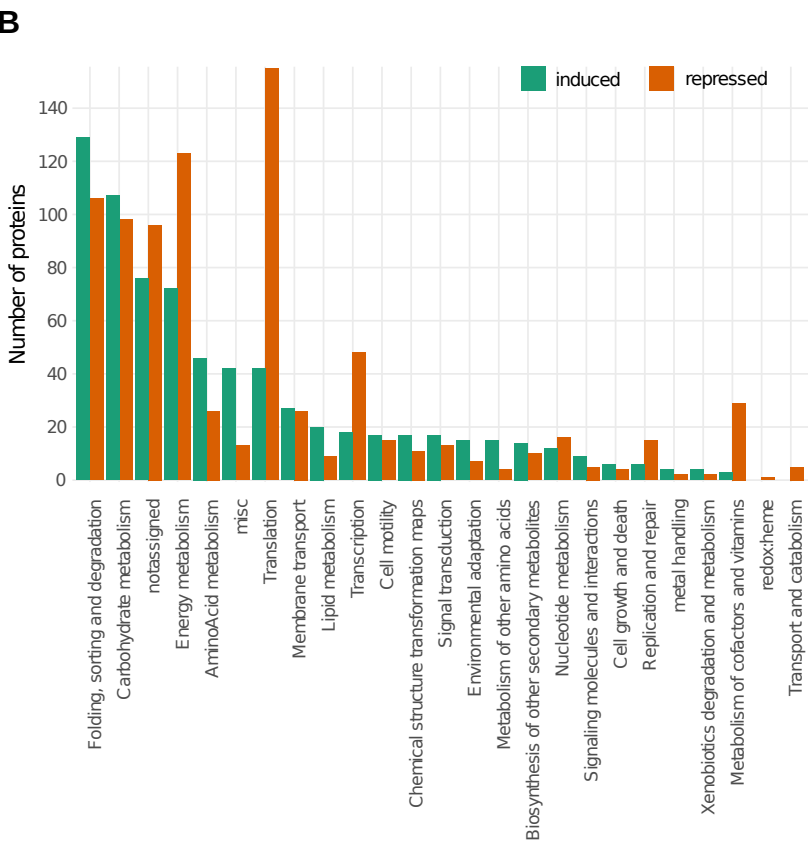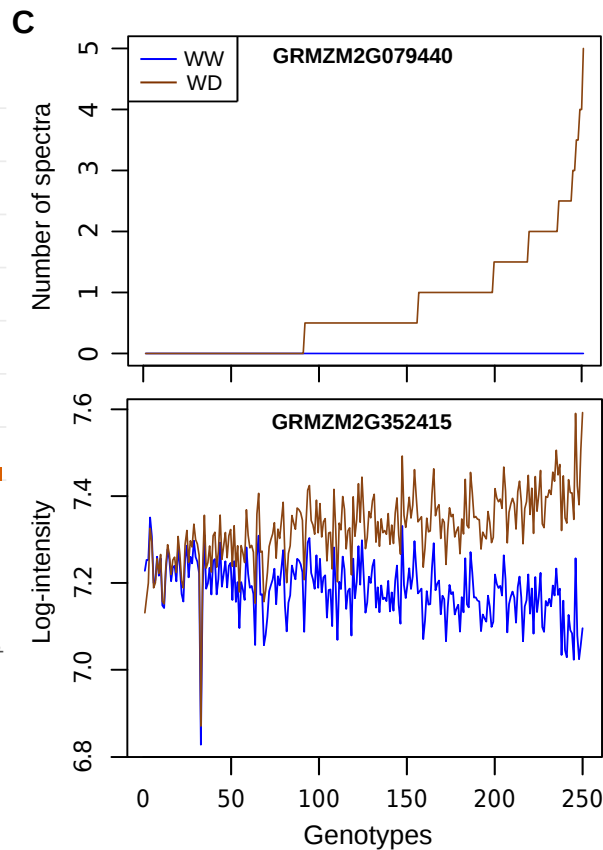

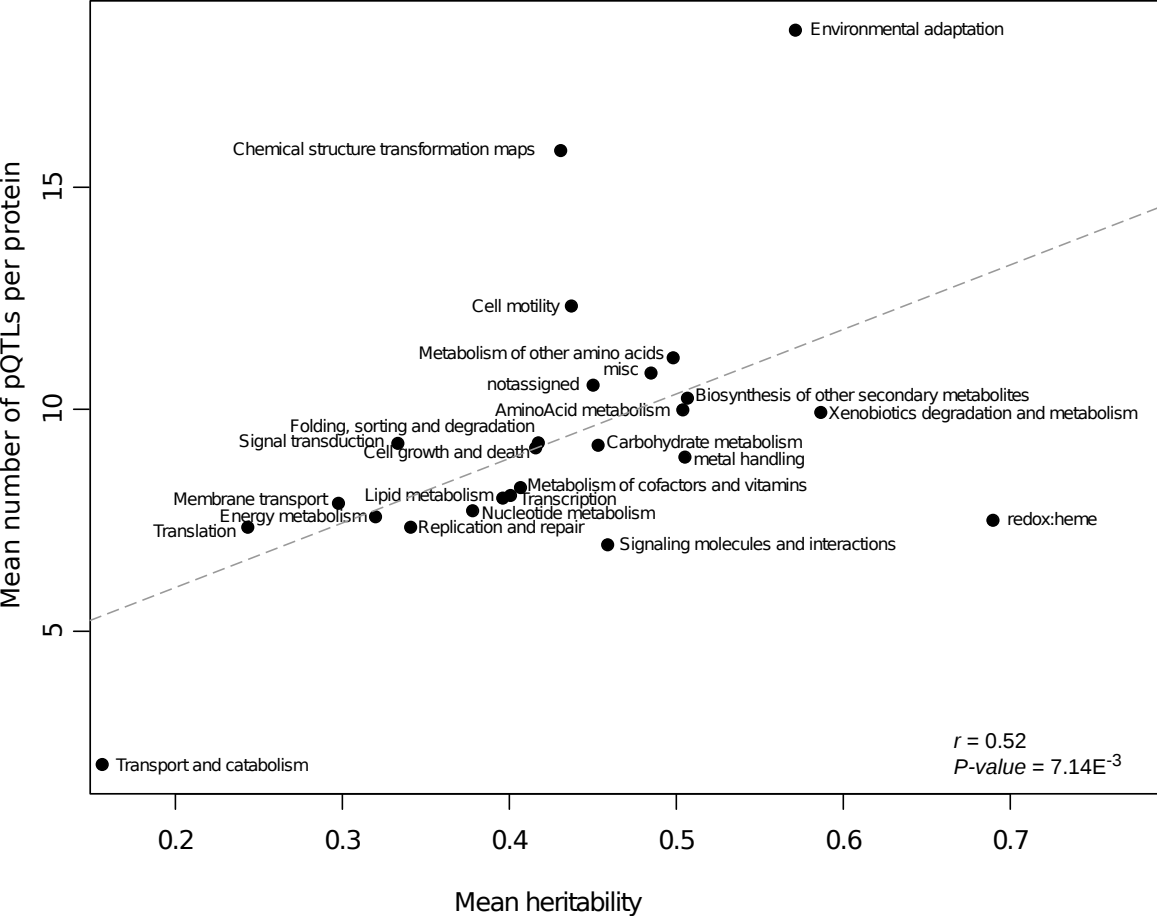



**A**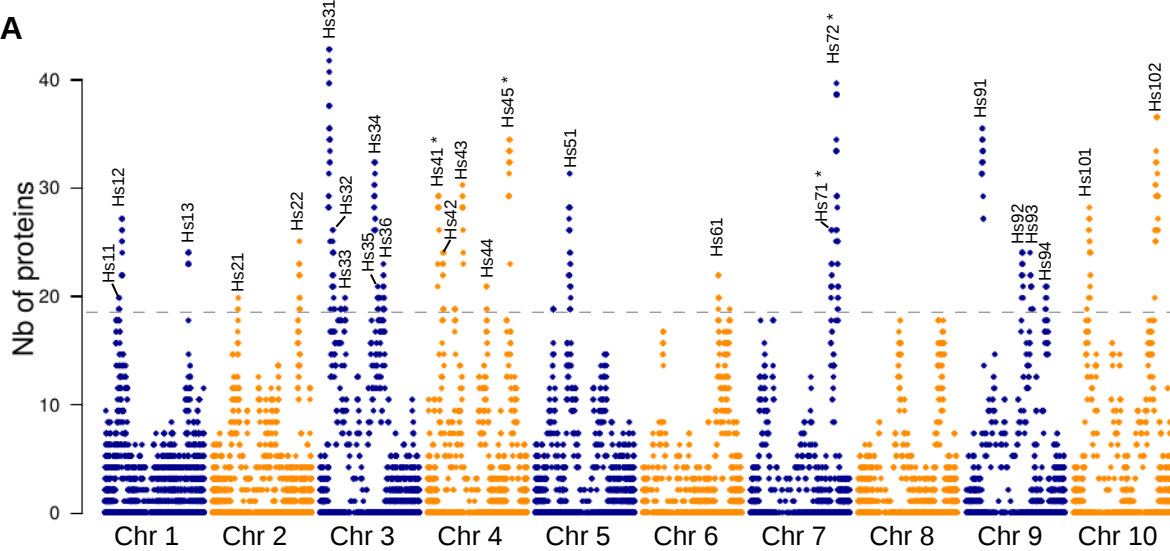**B**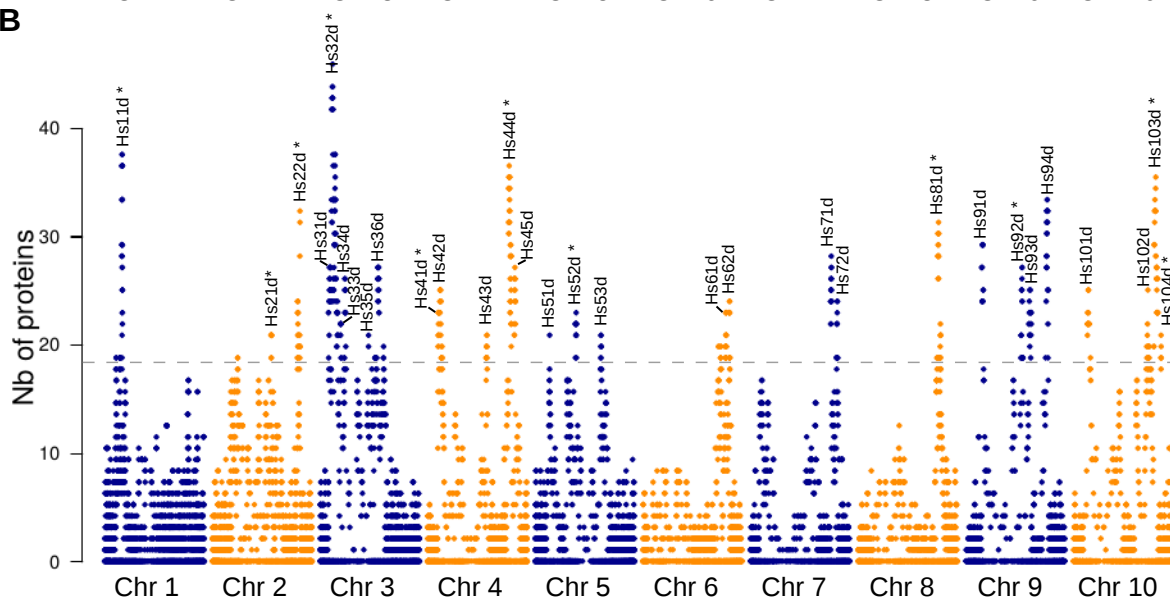

# WW network

1,240 proteins in 8 modules

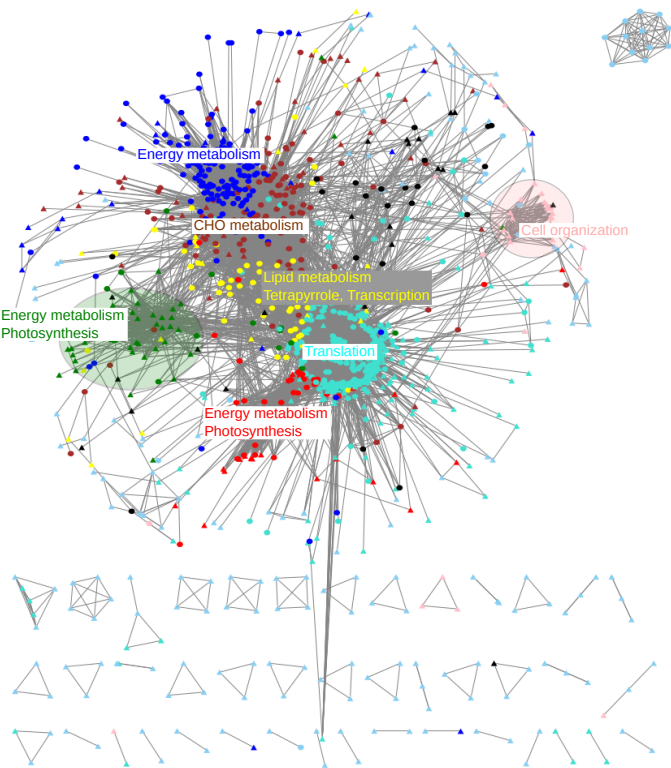

# WD network

1,165 proteins in 8 modules

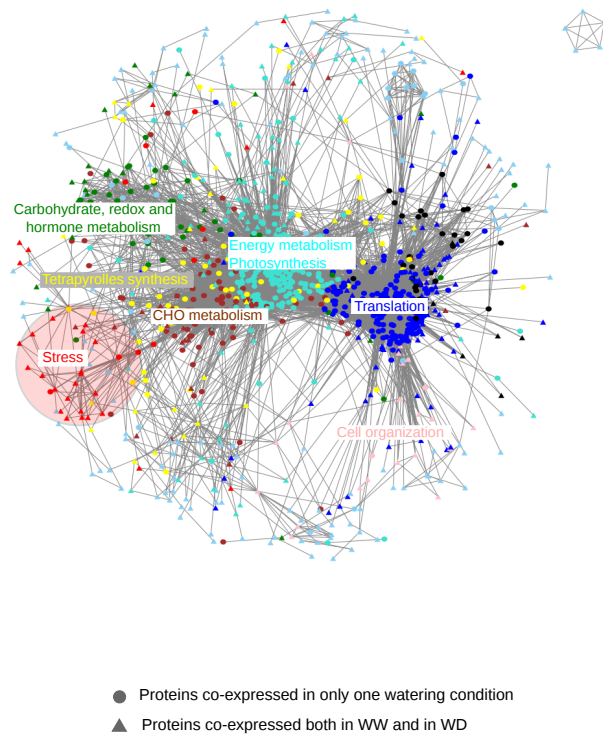

- Proteins co-expressed in only one watering condition
- ▲ Proteins co-expressed both in WW and in WD



Chromosome 1

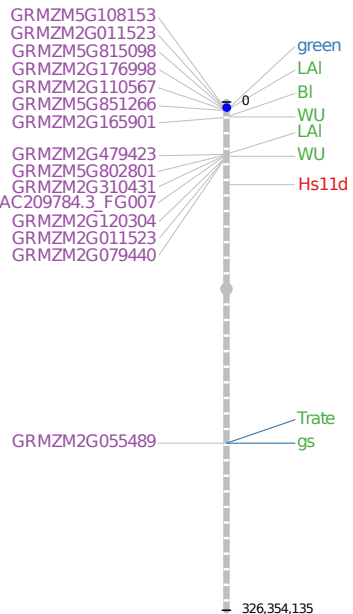

Chromosome 2

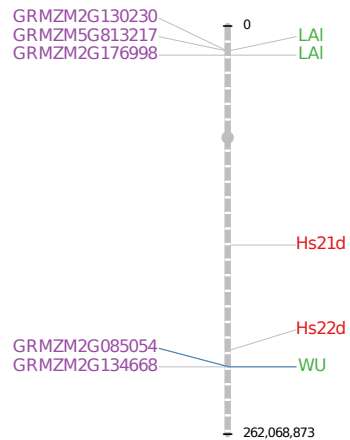

Chromosome 3

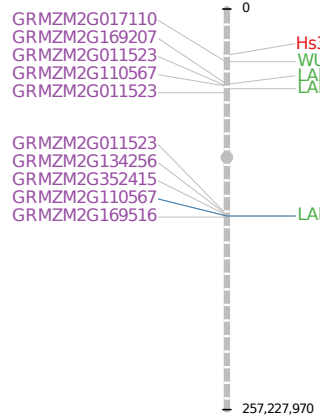

Chromosome 4

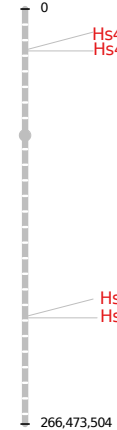

Chromosome 5

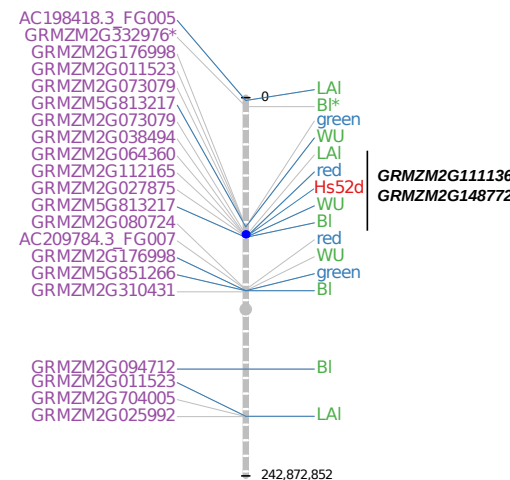

Chromosome 6

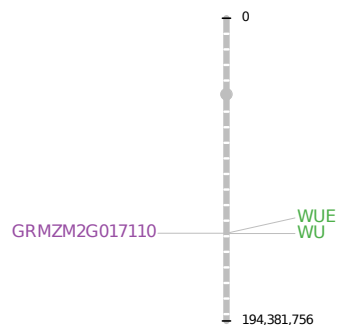

Chromosome 7

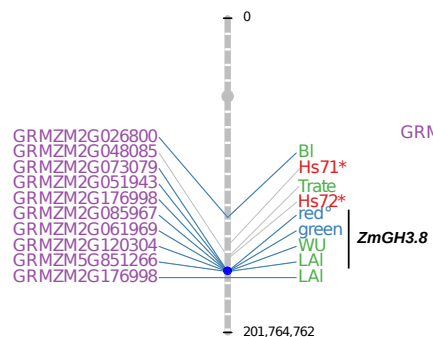

Chromosome 8

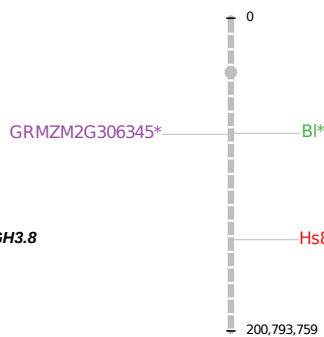

Chromosome 9

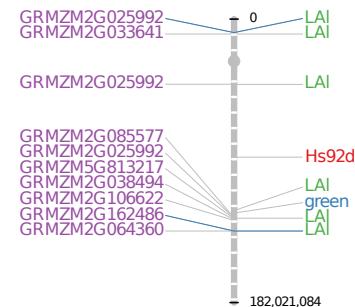

Chromosome 10

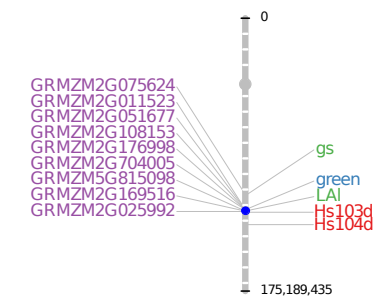

**A**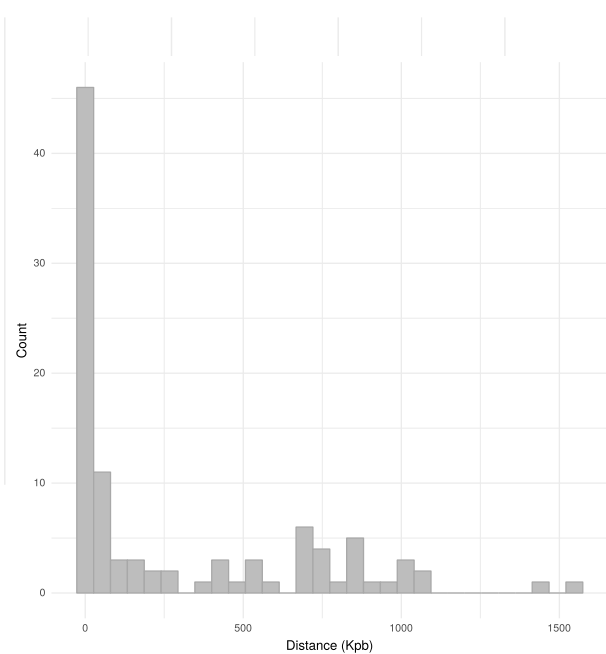**B**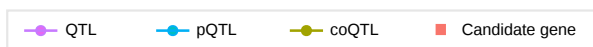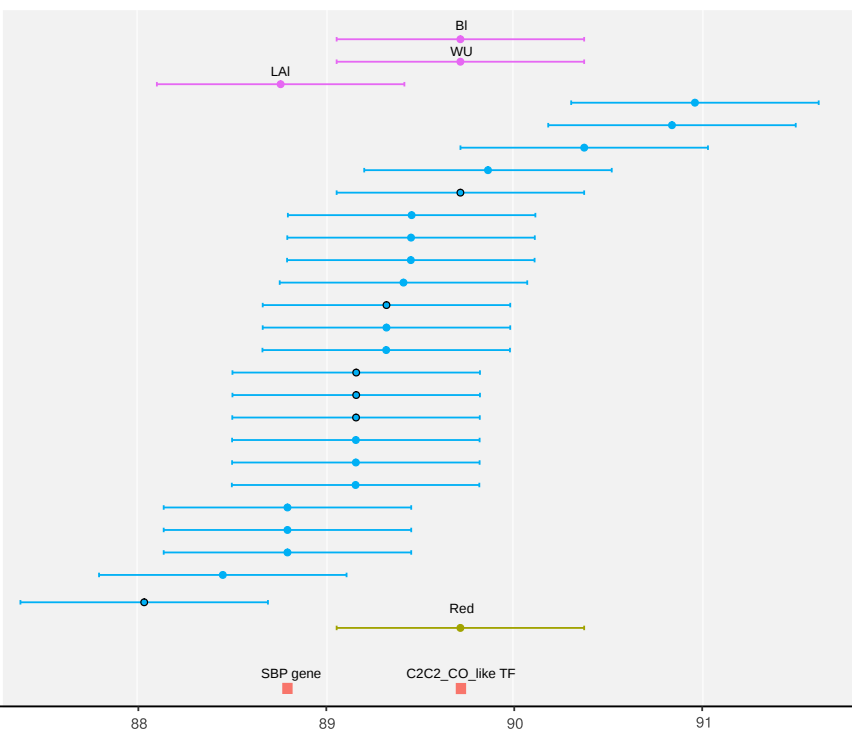

Source: https://www.biorxiv.org/content/biorxiv/early/2020/05/11/636514.full.pdf
